# Supplementary material for: GCAM-CDR v1.0: Enhancing the Representation of Carbon Dioxide Removal Technologies and Policies in an Integrated Assessment Model
Source: Copernicus journal article supplement (doi:10.5194/gmd-2022-125), 2022-05-24
Supplement: Supplementary file 1 [file gmd-2022-125-supplement.zip]

Archive with 8 entries (8 files):
- Morrow_et_al_2022_GCAM-CDR-1.0_SI.pdf
- scenario files/batch files/benchmarking_batch_cdrpolicy.xml
- scenario files/batch files/benchmarking_batch_corevrscdr_dac.xml
- scenario files/batch files/benchmarking_batch1_corevrscdr.xml
- scenario files/input/gcamdata/xml/IP2_OnlyDAC_Bench.xml
- scenario files/input/policy/linked_ghg_policy_cdr.xml
- scenario files/input/policy/S2_LOS.xml
- scenario files/README.txt
