# Supplementary material for: GCAM-CDR v1.0: Enhancing the Representation of Carbon Dioxide Removal Technologies and Policies in an Integrated Assessment Model
Source: Copernicus journal article supplement (doi:10.5194/gmd-2022-125), 2022-05-24
Supplement: Supplementary file 1 [file gmd-2022-125-supplement.zip › scenario files/batch files/benchmarking_batch1_corevrscdr.xml]

<?xml version="1.0" encoding="UTF-8"?>
<BatchRunner xmlns:xsi="http://www.w3.org/2001/XMLSchema-instance" xsi:noNamespaceSchemaLocation="batch_runner.xsd">
	<ComponentSet name="Policy">
		<FileSet name="Ref_">
		</FileSet>
		<FileSet name="Tax25_">
			<Value name="carbon_tax">../input/policy/carbon_tax_25_5.xml</Value>
			<Value name="tax_link">../input/policy/2025_target_finder.xml</Value>
			<Value name="nearterm_tax">../input/policy/carbon_tax_0_nearterm.xml</Value>
		</FileSet>
		<FileSet name="IP2_">
			<Value name = "ghg_constraint">../input/policy/S2_LOS.xml</Value>
			<Value name = "linked_ghg_policy">../input/policy/linked_ghg_policy_cdr.xml</Value>
		</FileSet>
	</ComponentSet>
	
	<ComponentSet name="BioSep">
		<FileSet name="Default_CDR"> 
		</FileSet>
		<FileSet name="BioSep_CDR">
			<Value name="bioseparation">../input/gcamdata/xml/bio_sep_final_final_final27.xml</Value>
			<Value name = "bioenergy_water">../input/gcamdata/xml/electricity_water_coefs_bio.xml</Value>
			<Value name = "bioliquids_limits">../input/gcamdata/xml/bio_sep_liquids_limits.xml</Value>
		</FileSet>
	</ComponentSet>
</BatchRunner>
