# Supplementary material for: GCAM-CDR v1.0: Enhancing the Representation of Carbon Dioxide Removal Technologies and Policies in an Integrated Assessment Model
Source: Copernicus journal article supplement (doi:10.5194/gmd-2022-125), 2022-05-24
Supplement: Supplementary file 1 [file gmd-2022-125-supplement.zip › scenario files/batch files/benchmarking_batch_cdrpolicy.xml]

<?xml version="1.0" encoding="UTF-8"?>
<BatchRunner xmlns:xsi="http://www.w3.org/2001/XMLSchema-instance" xsi:noNamespaceSchemaLocation="batch_runner.xsd">
	<ComponentSet name="BaseFiles">
		<FileSet name="GCAM_">
        <Value name = "climate">../input/gcamdata/xml/hector.xml</Value>
		<Value name = "socioeconomics">../input/gcamdata/xml/socioeconomics_gSSP2.xml</Value>
		<Value name = "resources">../input/gcamdata/xml/resources.xml</Value>
		<Value name = "energy_supply">../input/gcamdata/xml/en_supply.xml</Value>
		<Value name = "energy_transformation">../input/gcamdata/xml/en_transformation.xml</Value>
		<Value name = "elec_water_base">../input/gcamdata/xml/electricity_water.xml</Value>
		<Value name = "heat">../input/gcamdata/xml/heat.xml</Value>
		<Value name = "hydrogen">../input/gcamdata/xml/hydrogen.xml</Value>
		<Value name = "energy_distribution">../input/gcamdata/xml/en_distribution.xml</Value>
		<Value name = "industry">../input/gcamdata/xml/industry.xml</Value>
		<Value name = "industry_income_elas">../input/gcamdata/xml/industry_incelas_gssp2.xml</Value>
		<Value name = "cement">../input/gcamdata/xml/cement.xml</Value>
		<Value name = "cement_income_elas">../input/gcamdata/xml/cement_incelas_gssp2.xml</Value>
		<Value name = "fertilizer_energy">../input/gcamdata/xml/en_Fert.xml</Value>
		<Value name = "hddcdd">../input/gcamdata/xml/HDDCDD_constdd_no_GCM.xml</Value>
		<Value name = "building">../input/gcamdata/xml/building_det.xml</Value>
		<Value name = "transportation">../input/gcamdata/xml/transportation_UCD_CORE.xml</Value>
		<Value name = "carbon_content">../input/gcamdata/xml/Ccoef.xml</Value>
		<Value name = "carbon_storage">../input/gcamdata/xml/Cstorage.xml</Value>

		<Value name = "ag_base">../input/gcamdata/xml/ag_For_Past_bio_base_IRR_MGMT.xml</Value>
		<Value name = "ag_cost">../input/gcamdata/xml/ag_cost_IRR_MGMT.xml</Value>
		<Value name = "ag_prodchange">../input/gcamdata/xml/ag_prodchange_ref_IRR_MGMT.xml</Value>
		<Value name = "residue_bio">../input/gcamdata/xml/resbio_input_IRR_MGMT.xml</Value>
		<Value name = "animal">../input/gcamdata/xml/an_input.xml</Value>
		<Value name = "fertilizer">../input/gcamdata/xml/ag_Fert_IRR_MGMT.xml</Value>
		<Value name = "land1">../input/gcamdata/xml/land_input_1.xml</Value>
		<Value name = "land2">../input/gcamdata/xml/land_input_2.xml</Value>
		<Value name = "land3">../input/gcamdata/xml/land_input_3_IRR.xml</Value>
		<Value name = "land4">../input/gcamdata/xml/land_input_4_IRR_MGMT.xml</Value>
		<Value name = "land5">../input/gcamdata/xml/land_input_5_IRR_MGMT.xml</Value>
		<Value name = "protected_land2">../input/gcamdata/xml/protected_land_input_2.xml</Value>
		<Value name = "protected_land3">../input/gcamdata/xml/protected_land_input_3.xml</Value>
		<Value name = "demand">../input/gcamdata/xml/ag_an_demand_input.xml</Value>
		<Value name = "bio_trade">../input/gcamdata/xml/bio_trade.xml</Value>
		<Value name = "ag_trade">../input/gcamdata/xml/ag_trade.xml</Value>

		<Value name = "unlim_supply_water">../input/gcamdata/xml/unlimited_water_supply.xml</Value>
		<Value name = "water_supply">../input/gcamdata/xml/water_supply_constrained.xml</Value>
		<Value name = "water_desal">../input/gcamdata/xml/desalination.xml</Value>
		<Value name = "water_td">../input/gcamdata/xml/water_td.xml</Value>
		<Value name = "efw_coefs">../input/gcamdata/xml/EFW_input_coefs.xml</Value>
		<Value name = "efw_irr">../input/gcamdata/xml/EFW_irrigation.xml</Value>
		<Value name = "efw_mfg">../input/gcamdata/xml/EFW_manufacturing.xml</Value>
		<Value name = "efw_muni">../input/gcamdata/xml/EFW_municipal.xml</Value>
		<Value name = "ag_water">../input/gcamdata/xml/ag_water_input_IRR_MGMT.xml</Value>
		<Value name = "elec_water_coef">../input/gcamdata/xml/electricity_water_coefs.xml</Value>
		<Value name = "ind_water">../input/gcamdata/xml/water_demand_industry.xml</Value>
		<Value name = "an_water">../input/gcamdata/xml/water_demand_livestock.xml</Value>
		<Value name = "municipal_water">../input/gcamdata/xml/water_demand_municipal.xml</Value>
		<Value name = "primary_ene_water">../input/gcamdata/xml/water_demand_primary.xml</Value>

		<Value name = "ind_urb_proc">../input/gcamdata/xml/ind_urb_processing_sectors.xml</Value>
		<Value name = "nonco2_energy">../input/gcamdata/xml/all_energy_emissions.xml</Value>
		<Value name = "nonco2_fgas">../input/gcamdata/xml/all_fgas_emissions.xml</Value>
		<Value name = "nonco2_unmgd">../input/gcamdata/xml/all_unmgd_emissions.xml</Value>
		<Value name = "nonco2_aglu">../input/gcamdata/xml/all_aglu_emissions_IRR_MGMT.xml</Value>
		<Value name = "nonco2_aglu_prot">../input/gcamdata/xml/all_protected_unmgd_emissions.xml</Value>
		
		<!-- Global nonCO2 GHG MAC files -->
		<Value name = "nonco2_energy">../input/gcamdata/xml/all_energy_emissions_MAC.xml</Value>
		<Value name = "nonco2_fgas">../input/gcamdata/xml/all_fgas_emissions_MAC.xml</Value>
		<Value name = "nonco2_aglu">../input/gcamdata/xml/all_aglu_emissions_IRR_MGMT_MAC.xml</Value> 
		<Value name = "nonco2_proc">../input/gcamdata/xml/ind_urb_processing_sectors_MAC.xml</Value> 
		
		<!--Value name = "bio_feedstock_limit">../input/gcamdata/xml/liquids_limits.xml</Value>
		<Value name = "bio_elec_w_feed_limit">../input/gcamdata/xml/water_elec_liquids_limits.xml</Value-->
		<Value name = "bio_neg_emiss_budget">../input/gcamdata/xml/negative_emissions_budget_gSSP2.xml</Value>
        <Value name = "wind_update">../input/gcamdata/xml/onshore_wind.xml</Value>
		<Value name = "solver">../input/solution/cal_broyden_config.xml</Value>
		</FileSet>
	</ComponentSet>
	<ComponentSet name="CDRfiles">
		<FileSet name="CDR_">
			<Value name="bioseparation">../input/gcamdata/xml/bio_sep_final_final_final27.xml</Value>
			<Value name = "bioenergy_water">../input/gcamdata/xml/electricity_water_coefs_bio.xml</Value>
			<Value name = "bioliquids_limits">../input/gcamdata/xml/bio_sep_liquids_limits.xml</Value>
			
			<Value name = "cdr_supplysector">../input/gcamdata/xml/CDR.xml</Value>
			<Value name = "becccs_rampup">../input/gcamdata/xml/CDR_growth_limit.xml</Value>
			<Value name = "cdr_trade">../input/gcamdata/xml/CDR_traded.xml</Value>
			<Value name = "cdr_dac">../input/gcamdata/xml/DAC.xml</Value>
			<Value name = "waste_heat">../input/gcamdata/xml/waste_heat_endogenous.xml</Value>
			<Value name = "cdr_ew">../input/gcamdata/xml/TEW.xml</Value>
			<Value name = "cdr_ew_limit">../input/gcamdata/xml/limit_land.xml</Value>
			<Value name = "cdr_oae">../input/gcamdata/xml/OEW.xml</Value>
			<Value name = "oew_limit">../input/gcamdata/xml/OEW_shipping_new.xml</Value>
			<Value name = "cdr_nonenergy">../input/gcamdata/xml/CDR_costs.xml</Value>
			<Value name = "cdr_resources">../input/gcamdata/xml/resources_CDR.xml</Value>
			<Value name = "beccs_integration">../input/gcamdata/xml/BECCS_integration.xml</Value>		
			<Value name="carbon_tax">../input/policy/carbon_tax_25_5.xml</Value>
			<Value name="nearterm_tax">../input/policy/carbon_tax_0_nearterm.xml</Value>
			<Value name="tax_link">../input/policy/2025_target_finder.xml</Value>
		</FileSet>
	</ComponentSet>

	<ComponentSet name="CDRpolicy">
		<FileSet name="Exo5GtC">
			<Value name="cdr_demand">../input/policy/CDR/CDR_exo_5GtC.xml</Value>
		</FileSet>
		<FileSet name="Elastic">
			<Value name="cdr_demand">../input/policy/CDR/CDR_elastic_demand.xml</Value>
		</FileSet>
		<FileSet name="OffsetTest">
			<Value name="cdr_demand">../input/policy/CDR/CDR_offset_CO2.xml</Value>
		</FileSet>
		<FileSet name="Accumulated">
			<Value name="cdr_demand">../input/policy/CDR/CDR_offset_CO2_2005.xml</Value>
			<Value name="cdr_demand">../input/policy/CDR/CDR_accumulate_demand_10pc.xml</Value>
		</FileSet>
	</ComponentSet>
</BatchRunner>
