# Supplementary material for: GCAM-CDR v1.0: Enhancing the Representation of Carbon Dioxide Removal Technologies and Policies in an Integrated Assessment Model
Source: Copernicus journal article supplement (doi:10.5194/gmd-2022-125), 2022-05-24
Supplement: Supplementary file 1 [file gmd-2022-125-supplement.zip › scenario files/batch files/benchmarking_batch_corevrscdr_dac.xml]

<?xml version="1.0" encoding="UTF-8"?>
<BatchRunner xmlns:xsi="http://www.w3.org/2001/XMLSchema-instance" xsi:noNamespaceSchemaLocation="batch_runner.xsd">
	<ComponentSet name="Policy">
		<FileSet name="IP2_DAC-CDR">
				<!-- bioseparation -->
			<Value name="bioseparation">../input/gcamdata/xml/bio_sep_final_final_final27.xml</Value>
			<Value name = "bioenergy_water">../input/gcamdata/xml/electricity_water_coefs_bio.xml</Value>
			<Value name = "bioliquids_limits">../input/gcamdata/xml/bio_sep_liquids_limits.xml</Value>

		<!-- GHG constraint -->
			<Value name = "ghg_constraint">../input/policy/S2_LOS.xml</Value>
			<Value name = "linked_ghg_policy">../input/policy/linked_ghg_policy_cdr.xml</Value>
	<!-- add DAC CDR -->
			<Value name = "tew_off">../input/gcamdata/xml/IP2_OnlyDAC_Bench.xml</Value>
	<!-- add primary CDR -->
		<Value name = "cdr_supplysector">../input/gcamdata/xml/CDR.xml</Value>
		<Value name = "cdr_dac">../input/gcamdata/xml/DAC.xml</Value>
		<Value name = "waste_heat">../input/gcamdata/xml/waste_heat_endogenous.xml</Value>
        <Value name = "cdr_ew">../input/gcamdata/xml/TEW.xml</Value>
		<Value name = "cdr_ew_limit">../input/gcamdata/xml/limit_land.xml</Value>
		<Value name = "cdr_oae">../input/gcamdata/xml/OEW.xml</Value>
		<Value name = "oew_limit">../input/gcamdata/xml/OEW_shipping.xml</Value>
		<Value name = "cdr_nonenergy">../input/gcamdata/xml/CDR_costs.xml</Value>
		<Value name = "cdr_resources">../input/gcamdata/xml/resources_CDR.xml</Value>
			<Value name = "cdr_oae">../input/gcamdata/xml/Delete_TEW.xml</Value>
			<Value name = "cdr_oae">../input/gcamdata/xml/Delete_OEW.xml</Value>
			<Value name = "beccs_integration">../input/gcamdata/xml/BECCS_integration.xml</Value>
     		<Value name = "beccs_countersubsidy">../input/policy/CDR/counteract_BECCS_subsidy.xml</Value>

		</FileSet>

	<FileSet name="IP2_DAC-Core">
				<!-- bioseparation -->
			<Value name="bioseparation">../input/gcamdata/xml/bio_sep_final_final_final27.xml</Value>
			<Value name = "bioenergy_water">../input/gcamdata/xml/electricity_water_coefs_bio.xml</Value>
			<Value name = "bioliquids_limits">../input/gcamdata/xml/bio_sep_liquids_limits.xml</Value>
<Value name = "bioliquids_limits">../input/gcamdata/xml/dac_ssp2.xml</Value>
		<!-- GHG constraint -->
			<Value name = "ghg_constraint">../input/policy/S2_LOS.xml</Value>
			<Value name = "linked_ghg_policy">../input/policy/linked_ghg_policy_cdr.xml</Value>
	</FileSet>
	</ComponentSet>
	

</BatchRunner>
