# Supplementary material for: GCAM-CDR v1.0: Enhancing the Representation of Carbon Dioxide Removal Technologies and Policies in an Integrated Assessment Model
Source: Copernicus journal article supplement (doi:10.5194/gmd-2022-125), 2022-05-24
Supplement: Supplementary file 1 [file gmd-2022-125-supplement.zip › scenario files/input/gcamdata/xml/IP2_OnlyDAC_Bench.xml]

<?xml version="1.0" encoding="UTF-8"?><scenario>
    <world>
        <region name="Africa_Eastern">
            <CDR-final-demand name="CDR">
                <demand-source name="exogenous">
                    <demand year="2020">0</demand>
                    <demand year="2025">1.19632E-06</demand>
                    <demand year="2030">0.001727521</demand>
                    <demand year="2035">0.056701849</demand>
                    <demand year="2040">0.944799938</demand>
                    <demand year="2045">2.899969268</demand>
                    <demand year="2050">4.194832821</demand>
                    <demand year="2055">4.583084577</demand>
                    <demand year="2060">4.654902902</demand>
                    <demand year="2065">4.539595107</demand>
                    <demand year="2070">4.158725537</demand>
                    <demand year="2075">3.542243414</demand>
                    <demand year="2080">3.701597435</demand>
                    <demand year="2085">3.374906004</demand>
                    <demand year="2090">3.156573147</demand>
                    <demand year="2095">3.127001622</demand>
                    <demand year="2100">3.282550974</demand>
                </demand-source>
            </CDR-final-demand>
        </region>
        <region name="Africa_Northern">
            <CDR-final-demand name="CDR">
                <demand-source name="exogenous">
                    <demand year="2020">0</demand>
                    <demand year="2025">1.76029E-06</demand>
                    <demand year="2030">0.001473997</demand>
                    <demand year="2035">0.043743396</demand>
                    <demand year="2040">0.561462753</demand>
                    <demand year="2045">1.844928092</demand>
                    <demand year="2050">2.770921828</demand>
                    <demand year="2055">3.073139591</demand>
                    <demand year="2060">3.158596524</demand>
                    <demand year="2065">3.103118943</demand>
                    <demand year="2070">3.016350372</demand>
                    <demand year="2075">2.753474036</demand>
                    <demand year="2080">2.74173011</demand>
                    <demand year="2085">2.615417921</demand>
                    <demand year="2090">2.611889314</demand>
                    <demand year="2095">2.798543162</demand>
                    <demand year="2100">3.144386951</demand>
                </demand-source>
            </CDR-final-demand>
        </region>
        <region name="Africa_Southern">
            <CDR-final-demand name="CDR">
                <demand-source name="exogenous">
                    <demand year="2020">0</demand>
                    <demand year="2025">7.20548E-07</demand>
                    <demand year="2030">0.000587518</demand>
                    <demand year="2035">0.023604714</demand>
                    <demand year="2040">0.474300837</demand>
                    <demand year="2045">1.806665239</demand>
                    <demand year="2050">2.886472019</demand>
                    <demand year="2055">3.307310944</demand>
                    <demand year="2060">3.44842221</demand>
                    <demand year="2065">3.460790295</demand>
                    <demand year="2070">3.35481013</demand>
                    <demand year="2075">2.894780516</demand>
                    <demand year="2080">2.693585355</demand>
                    <demand year="2085">2.448015133</demand>
                    <demand year="2090">2.417623147</demand>
                    <demand year="2095">2.408180003</demand>
                    <demand year="2100">2.555277751</demand>
                </demand-source>
            </CDR-final-demand>
        </region>
        <region name="Africa_Western">
            <CDR-final-demand name="CDR">
                <demand-source name="exogenous">
                    <demand year="2020">0</demand>
                    <demand year="2025">3.76203E-06</demand>
                    <demand year="2030">0.00411498</demand>
                    <demand year="2035">0.140459932</demand>
                    <demand year="2040">2.421147037</demand>
                    <demand year="2045">7.812386602</demand>
                    <demand year="2050">11.28736092</demand>
                    <demand year="2055">12.36505942</demand>
                    <demand year="2060">12.56087572</demand>
                    <demand year="2065">12.30885028</demand>
                    <demand year="2070">11.57117769</demand>
                    <demand year="2075">10.01658754</demand>
                    <demand year="2080">8.427518531</demand>
                    <demand year="2085">8.294188925</demand>
                    <demand year="2090">7.280607356</demand>
                    <demand year="2095">6.615918679</demand>
                    <demand year="2100">6.370473306</demand>
                </demand-source>
            </CDR-final-demand>
        </region>
        <region name="Argentina">
            <CDR-final-demand name="CDR">
                <demand-source name="exogenous">
                    <demand year="2020">0</demand>
                    <demand year="2025">2.79302E-05</demand>
                    <demand year="2030">0.037269084</demand>
                    <demand year="2035">1.284516117</demand>
                    <demand year="2040">25.0126863</demand>
                    <demand year="2045">99.29728805</demand>
                    <demand year="2050">161.865098</demand>
                    <demand year="2055">192.5075938</demand>
                    <demand year="2060">211.2844884</demand>
                    <demand year="2065">224.3860725</demand>
                    <demand year="2070">233.9883513</demand>
                    <demand year="2075">240.1728416</demand>
                    <demand year="2080">245.1822473</demand>
                    <demand year="2085">248.8439573</demand>
                    <demand year="2090">255.6259387</demand>
                    <demand year="2095">263.579592</demand>
                    <demand year="2100">269.8220532</demand>
                </demand-source>
            </CDR-final-demand>
        </region>
        <region name="Australia_NZ">
            <CDR-final-demand name="CDR">
                <demand-source name="exogenous">
                    <demand year="2020">0</demand>
                    <demand year="2025">5.22515E-05</demand>
                    <demand year="2030">0.067709095</demand>
                    <demand year="2035">2.05878181</demand>
                    <demand year="2040">36.84091778</demand>
                    <demand year="2045">133.5338122</demand>
                    <demand year="2050">212.5752171</demand>
                    <demand year="2055">250.5449466</demand>
                    <demand year="2060">273.3469093</demand>
                    <demand year="2065">287.7050554</demand>
                    <demand year="2070">297.8219753</demand>
                    <demand year="2075">303.789491</demand>
                    <demand year="2080">308.1161272</demand>
                    <demand year="2085">310.1343327</demand>
                    <demand year="2090">314.79271</demand>
                    <demand year="2095">321.1455667</demand>
                    <demand year="2100">326.012787</demand>
                </demand-source>
            </CDR-final-demand>
        </region>
        <region name="Brazil">
            <CDR-final-demand name="CDR">
                <demand-source name="exogenous">
                    <demand year="2020">0</demand>
                    <demand year="2025">7.91633E-05</demand>
                    <demand year="2030">0.109045541</demand>
                    <demand year="2035">3.603307491</demand>
                    <demand year="2040">66.31890545</demand>
                    <demand year="2045">268.9540851</demand>
                    <demand year="2050">445.2368313</demand>
                    <demand year="2055">532.3996388</demand>
                    <demand year="2060">585.9351486</demand>
                    <demand year="2065">626.575059</demand>
                    <demand year="2070">658.2391936</demand>
                    <demand year="2075">682.8087267</demand>
                    <demand year="2080">704.6966274</demand>
                    <demand year="2085">720.9234741</demand>
                    <demand year="2090">745.2924136</demand>
                    <demand year="2095">771.3954304</demand>
                    <demand year="2100">790.9191841</demand>
                </demand-source>
            </CDR-final-demand>
        </region>
        <region name="Canada">
            <CDR-final-demand name="CDR">
                <demand-source name="exogenous">
                    <demand year="2020">0</demand>
                    <demand year="2025">5.60765E-06</demand>
                    <demand year="2030">0.008997159</demand>
                    <demand year="2035">0.335376534</demand>
                    <demand year="2040">6.585474025</demand>
                    <demand year="2045">24.48601175</demand>
                    <demand year="2050">37.42759842</demand>
                    <demand year="2055">42.69917467</demand>
                    <demand year="2060">45.1625391</demand>
                    <demand year="2065">46.27980346</demand>
                    <demand year="2070">46.4964779</demand>
                    <demand year="2075">45.85532771</demand>
                    <demand year="2080">44.69124047</demand>
                    <demand year="2085">43.201521</demand>
                    <demand year="2090">42.03581832</demand>
                    <demand year="2095">41.49667321</demand>
                    <demand year="2100">41.35301446</demand>
                </demand-source>
            </CDR-final-demand>
        </region>
        <region name="Central America and Caribbean">
            <CDR-final-demand name="CDR">
                <demand-source name="exogenous">
                    <demand year="2020">0</demand>
                    <demand year="2025">5.39745E-06</demand>
                    <demand year="2030">0.005998765</demand>
                    <demand year="2035">0.23755004</demand>
                    <demand year="2040">4.864687789</demand>
                    <demand year="2045">19.73078176</demand>
                    <demand year="2050">32.59443632</demand>
                    <demand year="2055">38.50013608</demand>
                    <demand year="2060">41.47550078</demand>
                    <demand year="2065">43.15844299</demand>
                    <demand year="2070">44.07945204</demand>
                    <demand year="2075">44.21672211</demand>
                    <demand year="2080">43.89680507</demand>
                    <demand year="2085">43.13288879</demand>
                    <demand year="2090">42.84431551</demand>
                    <demand year="2095">42.9814962</demand>
                    <demand year="2100">43.17650931</demand>
                </demand-source>
            </CDR-final-demand>
        </region>
        <region name="Central Asia">
            <CDR-final-demand name="CDR">
                <demand-source name="exogenous">
                    <demand year="2020">0</demand>
                    <demand year="2025">3.49296E-05</demand>
                    <demand year="2030">0.034312279</demand>
                    <demand year="2035">1.026809561</demand>
                    <demand year="2040">20.68966053</demand>
                    <demand year="2045">90.22842888</demand>
                    <demand year="2050">156.2973665</demand>
                    <demand year="2055">189.7666462</demand>
                    <demand year="2060">210.9886843</demand>
                    <demand year="2065">227.2037682</demand>
                    <demand year="2070">239.869862</demand>
                    <demand year="2075">248.7421736</demand>
                    <demand year="2080">256.075418</demand>
                    <demand year="2085">261.4165227</demand>
                    <demand year="2090">267.5807771</demand>
                    <demand year="2095">275.6693061</demand>
                    <demand year="2100">283.162308</demand>
                </demand-source>
            </CDR-final-demand>
        </region>
        <region name="China">
            <CDR-final-demand name="CDR">
                <demand-source name="exogenous">
                    <demand year="2020">0</demand>
                    <demand year="2025">0.000139032</demand>
                    <demand year="2030">0.156571577</demand>
                    <demand year="2035">5.789133071</demand>
                    <demand year="2040">116.1715377</demand>
                    <demand year="2045">484.3944648</demand>
                    <demand year="2050">809.1307122</demand>
                    <demand year="2055">958.5813445</demand>
                    <demand year="2060">1054.659625</demand>
                    <demand year="2065">1118.460522</demand>
                    <demand year="2070">1164.560745</demand>
                    <demand year="2075">1193.292066</demand>
                    <demand year="2080">1212.664452</demand>
                    <demand year="2085">1223.303625</demand>
                    <demand year="2090">1221.746457</demand>
                    <demand year="2095">1226.527149</demand>
                    <demand year="2100">1235.991717</demand>
                </demand-source>
            </CDR-final-demand>
        </region>
        <region name="Colombia">
            <CDR-final-demand name="CDR">
                <demand-source name="exogenous">
                    <demand year="2020">0</demand>
                    <demand year="2025">1.47419E-05</demand>
                    <demand year="2030">0.014415538</demand>
                    <demand year="2035">0.491573094</demand>
                    <demand year="2040">9.818081977</demand>
                    <demand year="2045">37.40190207</demand>
                    <demand year="2050">60.57698417</demand>
                    <demand year="2055">72.25252539</demand>
                    <demand year="2060">79.32991506</demand>
                    <demand year="2065">84.3277393</demand>
                    <demand year="2070">88.18410864</demand>
                    <demand year="2075">91.01851447</demand>
                    <demand year="2080">93.24097731</demand>
                    <demand year="2085">94.74572481</demand>
                    <demand year="2090">97.4502385</demand>
                    <demand year="2095">100.5936061</demand>
                    <demand year="2100">102.8158244</demand>
                </demand-source>
            </CDR-final-demand>
        </region>
        <region name="EU-12">
            <CDR-final-demand name="CDR">
                <demand-source name="exogenous">
                    <demand year="2020">0</demand>
                    <demand year="2025">1.43595E-06</demand>
                    <demand year="2030">0.001367446</demand>
                    <demand year="2035">0.034957005</demand>
                    <demand year="2040">0.39697843</demand>
                    <demand year="2045">1.247257017</demand>
                    <demand year="2050">1.857369651</demand>
                    <demand year="2055">2.066178628</demand>
                    <demand year="2060">2.142486455</demand>
                    <demand year="2065">2.153521639</demand>
                    <demand year="2070">2.143342599</demand>
                    <demand year="2075">2.082976524</demand>
                    <demand year="2080">2.058718288</demand>
                    <demand year="2085">2.065144978</demand>
                    <demand year="2090">2.139723545</demand>
                    <demand year="2095">2.338059869</demand>
                    <demand year="2100">2.643548797</demand>
                </demand-source>
            </CDR-final-demand>
        </region>
        <region name="EU-15">
            <CDR-final-demand name="CDR">
                <demand-source name="exogenous">
                    <demand year="2020">0</demand>
                    <demand year="2025">5.73225E-06</demand>
                    <demand year="2030">0.00623794</demand>
                    <demand year="2035">0.142360765</demand>
                    <demand year="2040">1.446092868</demand>
                    <demand year="2045">4.319645704</demand>
                    <demand year="2050">6.216317513</demand>
                    <demand year="2055">6.833877214</demand>
                    <demand year="2060">6.978337713</demand>
                    <demand year="2065">6.019385072</demand>
                    <demand year="2070">6.997674103</demand>
                    <demand year="2075">7.117077872</demand>
                    <demand year="2080">7.297683043</demand>
                    <demand year="2085">7.713313911</demand>
                    <demand year="2090">8.776071203</demand>
                    <demand year="2095">10.29483891</demand>
                    <demand year="2100">12.22350116</demand>
                </demand-source>
            </CDR-final-demand>
        </region>
        <region name="Europe_Eastern">
            <CDR-final-demand name="CDR">
                <demand-source name="exogenous">
                    <demand year="2020">0</demand>
                    <demand year="2025">9.13525E-07</demand>
                    <demand year="2030">0.00096375</demand>
                    <demand year="2035">0.033656708</demand>
                    <demand year="2040">0.646903495</demand>
                    <demand year="2045">2.59478376</demand>
                    <demand year="2050">4.234432341</demand>
                    <demand year="2055">4.903346103</demand>
                    <demand year="2060">5.222169816</demand>
                    <demand year="2065">5.38279366</demand>
                    <demand year="2070">5.420859447</demand>
                    <demand year="2075">5.324650722</demand>
                    <demand year="2080">5.131472017</demand>
                    <demand year="2085">4.869754385</demand>
                    <demand year="2090">4.599862816</demand>
                    <demand year="2095">4.41213157</demand>
                    <demand year="2100">4.315264132</demand>
                </demand-source>
            </CDR-final-demand>
        </region>
        <region name="Europe_Non_EU">
            <CDR-final-demand name="CDR">
                <demand-source name="exogenous">
                    <demand year="2020">0</demand>
                    <demand year="2025">1.22767E-06</demand>
                    <demand year="2030">0.00099217</demand>
                    <demand year="2035">0.026278649</demand>
                    <demand year="2040">0.299511843</demand>
                    <demand year="2045">0.928396594</demand>
                    <demand year="2050">1.366538351</demand>
                    <demand year="2055">1.51002041</demand>
                    <demand year="2060">1.538322912</demand>
                    <demand year="2065">1.342722178</demand>
                    <demand year="2070">1.315220054</demand>
                    <demand year="2075">1.115837882</demand>
                    <demand year="2080">1.346606718</demand>
                    <demand year="2085">1.282696272</demand>
                    <demand year="2090">1.265060463</demand>
                    <demand year="2095">1.315532706</demand>
                    <demand year="2100">1.434145325</demand>
                </demand-source>
            </CDR-final-demand>
        </region>
        <region name="European Free Trade Association">
            <CDR-final-demand name="CDR">
                <demand-source name="exogenous">
                    <demand year="2020">0</demand>
                    <demand year="2025">5.5659E-07</demand>
                    <demand year="2030">0.001040993</demand>
                    <demand year="2035">0.036725818</demand>
                    <demand year="2040">0.454769536</demand>
                    <demand year="2045">1.25714449</demand>
                    <demand year="2050">1.753990075</demand>
                    <demand year="2055">1.914800058</demand>
                    <demand year="2060">1.943101452</demand>
                    <demand year="2065">1.879418731</demand>
                    <demand year="2070">1.817048617</demand>
                    <demand year="2075">1.747776291</demand>
                    <demand year="2080">1.607187355</demand>
                    <demand year="2085">1.50178107</demand>
                    <demand year="2090">1.452412697</demand>
                    <demand year="2095">1.501881915</demand>
                    <demand year="2100">1.640948085</demand>
                </demand-source>
            </CDR-final-demand>
        </region>
        <region name="India">
            <CDR-final-demand name="CDR">
                <demand-source name="exogenous">
                    <demand year="2020">0</demand>
                    <demand year="2025">5.22959E-06</demand>
                    <demand year="2030">0.003241698</demand>
                    <demand year="2035">0.039266563</demand>
                    <demand year="2040">0.244373598</demand>
                    <demand year="2045">0.599131305</demand>
                    <demand year="2050">0.288025984</demand>
                    <demand year="2055">0.509793647</demand>
                    <demand year="2060">0.406845552</demand>
                    <demand year="2065">0.927437832</demand>
                    <demand year="2070">1.240230821</demand>
                    <demand year="2075">1.835525546</demand>
                    <demand year="2080">2.433498626</demand>
                    <demand year="2085">3.1193947</demand>
                    <demand year="2090">4.245955329</demand>
                    <demand year="2095">5.898815017</demand>
                    <demand year="2100">7.961207528</demand>
                </demand-source>
            </CDR-final-demand>
        </region>
        <region name="Indonesia">
            <CDR-final-demand name="CDR">
                <demand-source name="exogenous">
                    <demand year="2020">0</demand>
                    <demand year="2025">1.27127E-06</demand>
                    <demand year="2030">0.000840045</demand>
                    <demand year="2035">0.014206437</demand>
                    <demand year="2040">0.105304439</demand>
                    <demand year="2045">0.250237811</demand>
                    <demand year="2050">0.333032011</demand>
                    <demand year="2055">0.145978262</demand>
                    <demand year="2060">0.133932151</demand>
                    <demand year="2065">0.248220608</demand>
                    <demand year="2070">0.412580693</demand>
                    <demand year="2075">0.53856851</demand>
                    <demand year="2080">0.640939416</demand>
                    <demand year="2085">0.778123128</demand>
                    <demand year="2090">1.009766282</demand>
                    <demand year="2095">1.344720183</demand>
                    <demand year="2100">1.747924477</demand>
                </demand-source>
            </CDR-final-demand>
        </region>
        <region name="Japan">
            <CDR-final-demand name="CDR">
                <demand-source name="exogenous">
                    <demand year="2020">0</demand>
                    <demand year="2025">6.77416E-06</demand>
                    <demand year="2030">0.00580851</demand>
                    <demand year="2035">0.214258302</demand>
                    <demand year="2040">4.155492251</demand>
                    <demand year="2045">15.57085952</demand>
                    <demand year="2050">24.1228839</demand>
                    <demand year="2055">27.67752472</demand>
                    <demand year="2060">29.33395917</demand>
                    <demand year="2065">30.0591561</demand>
                    <demand year="2070">30.13453431</demand>
                    <demand year="2075">29.55501745</demand>
                    <demand year="2080">28.55651407</demand>
                    <demand year="2085">27.28986876</demand>
                    <demand year="2090">26.32131415</demand>
                    <demand year="2095">25.93541784</demand>
                    <demand year="2100">26.11164912</demand>
                </demand-source>
            </CDR-final-demand>
        </region>
        <region name="Mexico">
            <CDR-final-demand name="CDR">
                <demand-source name="exogenous">
                    <demand year="2020">0</demand>
                    <demand year="2025">2.29229E-05</demand>
                    <demand year="2030">0.023186779</demand>
                    <demand year="2035">1.026488527</demand>
                    <demand year="2040">21.06556835</demand>
                    <demand year="2045">78.19072026</demand>
                    <demand year="2050">116.9845484</demand>
                    <demand year="2055">133.0332256</demand>
                    <demand year="2060">140.3538064</demand>
                    <demand year="2065">143.6723679</demand>
                    <demand year="2070">144.4233709</demand>
                    <demand year="2075">142.758948</demand>
                    <demand year="2080">139.5068675</demand>
                    <demand year="2085">135.0954531</demand>
                    <demand year="2090">132.6744249</demand>
                    <demand year="2095">132.9566628</demand>
                    <demand year="2100">134.5364997</demand>
                </demand-source>
            </CDR-final-demand>
        </region>
        <region name="Middle East">
            <CDR-final-demand name="CDR">
                <demand-source name="exogenous">
                    <demand year="2020">0</demand>
                    <demand year="2025">1.47407E-05</demand>
                    <demand year="2030">0.015700515</demand>
                    <demand year="2035">0.615978184</demand>
                    <demand year="2040">13.00571102</demand>
                    <demand year="2045">57.11925248</demand>
                    <demand year="2050">96.18317415</demand>
                    <demand year="2055">114.3889187</demand>
                    <demand year="2060">124.0845089</demand>
                    <demand year="2065">130.1008053</demand>
                    <demand year="2070">133.8536287</demand>
                    <demand year="2075">135.1288665</demand>
                    <demand year="2080">134.5971317</demand>
                    <demand year="2085">132.2794164</demand>
                    <demand year="2090">131.9953771</demand>
                    <demand year="2095">132.6476291</demand>
                    <demand year="2100">132.6004696</demand>
                </demand-source>
            </CDR-final-demand>
        </region>
        <region name="Pakistan">
            <CDR-final-demand name="CDR">
                <demand-source name="exogenous">
                    <demand year="2020">0</demand>
                    <demand year="2025">2.90029E-07</demand>
                    <demand year="2030">0.000300348</demand>
                    <demand year="2035">0.005984683</demand>
                    <demand year="2040">0.042759033</demand>
                    <demand year="2045">0.094610086</demand>
                    <demand year="2050">0.08859583</demand>
                    <demand year="2055">0.030088942</demand>
                    <demand year="2060">0.034594474</demand>
                    <demand year="2065">0.040913746</demand>
                    <demand year="2070">0.050455765</demand>
                    <demand year="2075">0.067697301</demand>
                    <demand year="2080">0.133160726</demand>
                    <demand year="2085">0.177799636</demand>
                    <demand year="2090">0.232915657</demand>
                    <demand year="2095">0.302499869</demand>
                    <demand year="2100">0.383903737</demand>
                </demand-source>
            </CDR-final-demand>
        </region>
        <region name="Russia">
            <CDR-final-demand name="CDR">
                <demand-source name="exogenous">
                    <demand year="2020">0</demand>
                    <demand year="2025">3.25834E-05</demand>
                    <demand year="2030">0.024843369</demand>
                    <demand year="2035">0.87266552</demand>
                    <demand year="2040">17.97440865</demand>
                    <demand year="2045">77.36517549</demand>
                    <demand year="2050">132.5865804</demand>
                    <demand year="2055">159.3229134</demand>
                    <demand year="2060">173.8721197</demand>
                    <demand year="2065">183.1371122</demand>
                    <demand year="2070">189.1055913</demand>
                    <demand year="2075">191.4331116</demand>
                    <demand year="2080">191.9250109</demand>
                    <demand year="2085">191.2333571</demand>
                    <demand year="2090">191.6930442</demand>
                    <demand year="2095">194.3046136</demand>
                    <demand year="2100">197.225794</demand>
                </demand-source>
            </CDR-final-demand>
        </region>
        <region name="South Africa">
            <CDR-final-demand name="CDR">
                <demand-source name="exogenous">
                    <demand year="2020">0</demand>
                    <demand year="2025">2.51305E-07</demand>
                    <demand year="2030">0.000209637</demand>
                    <demand year="2035">0.002613027</demand>
                    <demand year="2040">0.019037876</demand>
                    <demand year="2045">0.052285694</demand>
                    <demand year="2050">0.060804677</demand>
                    <demand year="2055">0.054451282</demand>
                    <demand year="2060">0.072129171</demand>
                    <demand year="2065">0.091301077</demand>
                    <demand year="2070">0.136578418</demand>
                    <demand year="2075">0.175120277</demand>
                    <demand year="2080">0.214544136</demand>
                    <demand year="2085">0.268985727</demand>
                    <demand year="2090">0.345958376</demand>
                    <demand year="2095">0.449118794</demand>
                    <demand year="2100">0.570286206</demand>
                </demand-source>
            </CDR-final-demand>
        </region>
        <region name="South America_Northern">
            <CDR-final-demand name="CDR">
                <demand-source name="exogenous">
                    <demand year="2020">0</demand>
                    <demand year="2025">6.0699E-06</demand>
                    <demand year="2030">0.00754715</demand>
                    <demand year="2035">0.272568652</demand>
                    <demand year="2040">5.469185256</demand>
                    <demand year="2045">23.85647011</demand>
                    <demand year="2050">40.11110044</demand>
                    <demand year="2055">50.15344543</demand>
                    <demand year="2060">57.90073303</demand>
                    <demand year="2065">72.66255416</demand>
                    <demand year="2070">86.18294574</demand>
                    <demand year="2075">98.63350843</demand>
                    <demand year="2080">109.4226632</demand>
                    <demand year="2085">117.3759423</demand>
                    <demand year="2090">124.7093523</demand>
                    <demand year="2095">131.6097656</demand>
                    <demand year="2100">135.5376832</demand>
                </demand-source>
            </CDR-final-demand>
        </region>
        <region name="South America_Southern">
            <CDR-final-demand name="CDR">
                <demand-source name="exogenous">
                    <demand year="2020">0</demand>
                    <demand year="2025">3.82828E-05</demand>
                    <demand year="2030">0.056525007</demand>
                    <demand year="2035">1.937350992</demand>
                    <demand year="2040">37.62032612</demand>
                    <demand year="2045">138.4932174</demand>
                    <demand year="2050">219.1884506</demand>
                    <demand year="2055">258.2272634</demand>
                    <demand year="2060">281.7310865</demand>
                    <demand year="2065">297.653244</demand>
                    <demand year="2070">309.6326976</demand>
                    <demand year="2075">318.5983939</demand>
                    <demand year="2080">326.8974799</demand>
                    <demand year="2085">333.697804</demand>
                    <demand year="2090">344.6951465</demand>
                    <demand year="2095">357.2251768</demand>
                    <demand year="2100">366.4390841</demand>
                </demand-source>
            </CDR-final-demand>
        </region>
        <region name="South Asia">
            <CDR-final-demand name="CDR">
                <demand-source name="exogenous">
                    <demand year="2020">0</demand>
                    <demand year="2025">3.88779E-07</demand>
                    <demand year="2030">0.000609574</demand>
                    <demand year="2035">0.012672649</demand>
                    <demand year="2040">0.123543791</demand>
                    <demand year="2045">0.340136768</demand>
                    <demand year="2050">0.469951342</demand>
                    <demand year="2055">0.402891178</demand>
                    <demand year="2060">0.166811067</demand>
                    <demand year="2065">0.209998451</demand>
                    <demand year="2070">0.301070562</demand>
                    <demand year="2075">0.445534043</demand>
                    <demand year="2080">0.512474325</demand>
                    <demand year="2085">0.54280125</demand>
                    <demand year="2090">0.62017843</demand>
                    <demand year="2095">0.753974024</demand>
                    <demand year="2100">0.931526444</demand>
                </demand-source>
            </CDR-final-demand>
        </region>
        <region name="Southeast Asia">
            <CDR-final-demand name="CDR">
                <demand-source name="exogenous">
                    <demand year="2020">0</demand>
                    <demand year="2025">1.53096E-05</demand>
                    <demand year="2030">0.014288041</demand>
                    <demand year="2035">0.496067756</demand>
                    <demand year="2040">9.146287922</demand>
                    <demand year="2045">32.62862429</demand>
                    <demand year="2050">49.90180736</demand>
                    <demand year="2055">56.34283685</demand>
                    <demand year="2060">58.28794159</demand>
                    <demand year="2065">58.78688822</demand>
                    <demand year="2070">57.81872675</demand>
                    <demand year="2075">55.2858942</demand>
                    <demand year="2080">51.60671087</demand>
                    <demand year="2085">47.22149997</demand>
                    <demand year="2090">43.60122825</demand>
                    <demand year="2095">41.57562984</demand>
                    <demand year="2100">38.70539455</demand>
                </demand-source>
            </CDR-final-demand>
        </region>
        <region name="Taiwan">
            <CDR-final-demand name="CDR">
                <demand-source name="exogenous">
                    <demand year="2020">0</demand>
                    <demand year="2025">2.44388E-08</demand>
                    <demand year="2030">4.58661E-07</demand>
                    <demand year="2035">7.34117E-06</demand>
                    <demand year="2040">0.00022571</demand>
                    <demand year="2045">0.001513383</demand>
                    <demand year="2050">0.003660967</demand>
                    <demand year="2055">0.005000459</demand>
                    <demand year="2060">0.006347014</demand>
                    <demand year="2065">0.007842549</demand>
                    <demand year="2070">0.009873886</demand>
                    <demand year="2075">0.012274905</demand>
                    <demand year="2080">0.01566457</demand>
                    <demand year="2085">0.020249154</demand>
                    <demand year="2090">0.027798037</demand>
                    <demand year="2095">0.037941629</demand>
                    <demand year="2100">0.049307193</demand>
                </demand-source>
            </CDR-final-demand>
        </region>
        <region name="USA">
            <CDR-final-demand name="CDR">
                <demand-source name="exogenous">
                    <demand year="2020">0</demand>
                    <demand year="2025">0.000210368</demand>
                    <demand year="2030">0.387932345</demand>
                    <demand year="2035">13.49102056</demand>
                    <demand year="2040">202.3567194</demand>
                    <demand year="2045">697.2170101</demand>
                    <demand year="2050">1052.157255</demand>
                    <demand year="2055">1211.036645</demand>
                    <demand year="2060">1294.423211</demand>
                    <demand year="2065">1342.059879</demand>
                    <demand year="2070">1368.808588</demand>
                    <demand year="2075">1372.406565</demand>
                    <demand year="2080">1366.237783</demand>
                    <demand year="2085">1349.736711</demand>
                    <demand year="2090">1346.255825</demand>
                    <demand year="2095">1357.046869</demand>
                    <demand year="2100">1365.749874</demand>
                </demand-source>
            </CDR-final-demand>
        </region>
    </world>
</scenario>
