# Supplementary material for: GCAM-CDR v1.0: Enhancing the Representation of Carbon Dioxide Removal Technologies and Policies in an Integrated Assessment Model
Source: Copernicus journal article supplement (doi:10.5194/gmd-2022-125), 2022-05-24
Supplement: Supplementary file 1 [file gmd-2022-125-supplement.zip › scenario files/input/policy/linked_ghg_policy_cdr.xml]

<?xml version="1.0" encoding="UTF-8"?><scenario>
    <world>
        <region name="USA">
            <linked-ghg-policy name="CO2">
                <price-adjust fillout="1" year="1975">1</price-adjust>
                <demand-adjust fillout="1" year="1975">3.666666667</demand-adjust>
                <market>global</market>
                <linked-policy>GHG</linked-policy>
                <price-unit>1990$/tC</price-unit>
                <output-unit>MtC</output-unit>
            </linked-ghg-policy>
            <linked-ghg-policy name="CH4">
                <price-adjust fillout="1" year="1975">5.727272727</price-adjust>
                <demand-adjust fillout="1" year="1975">21</demand-adjust>
                <market>global</market>
                <linked-policy>GHG</linked-policy>
                <price-unit>1990$/GgCH4</price-unit>
                <output-unit>TgCH4</output-unit>
            </linked-ghg-policy>
            <linked-ghg-policy name="N2O">
                <price-adjust fillout="1" year="1975">84.54545454</price-adjust>
                <demand-adjust fillout="1" year="1975">310</demand-adjust>
                <market>global</market>
                <linked-policy>GHG</linked-policy>
                <price-unit>1990$/GgN2o</price-unit>
                <output-unit>TgN2O</output-unit>
            </linked-ghg-policy>
            <linked-ghg-policy name="C2F6">
                <price-adjust fillout="1" year="1975">0</price-adjust>
                <demand-adjust fillout="1" year="1975">9.2</demand-adjust>
                <market>global</market>
                <linked-policy>GHG</linked-policy>
                <price-unit>1990$/MgC2F6</price-unit>
                <output-unit>GgC2F6</output-unit>
            </linked-ghg-policy>
            <linked-ghg-policy name="CF4">
                <price-adjust fillout="1" year="1975">0</price-adjust>
                <demand-adjust fillout="1" year="1975">6.5</demand-adjust>
                <market>global</market>
                <linked-policy>GHG</linked-policy>
                <price-unit>1990$/MgCF4</price-unit>
                <output-unit>GgCF4</output-unit>
            </linked-ghg-policy>
            <linked-ghg-policy name="HFC125">
                <price-adjust fillout="1" year="1975">0</price-adjust>
                <demand-adjust fillout="1" year="1975">2.8</demand-adjust>
                <market>global</market>
                <linked-policy>GHG</linked-policy>
                <price-unit>1990$/MgHFC125</price-unit>
                <output-unit>GgHFC125</output-unit>
            </linked-ghg-policy>
            <linked-ghg-policy name="HFC134a">
                <price-adjust fillout="1" year="1975">0</price-adjust>
                <demand-adjust fillout="1" year="1975">1.3</demand-adjust>
                <market>global</market>
                <linked-policy>GHG</linked-policy>
                <price-unit>1990$/MgHFC134a</price-unit>
                <output-unit>GgHFC134a</output-unit>
            </linked-ghg-policy>
            <linked-ghg-policy name="HFC245fa">
                <price-adjust fillout="1" year="1975">0</price-adjust>
                <demand-adjust fillout="1" year="1975">1.03</demand-adjust>
                <market>global</market>
                <linked-policy>GHG</linked-policy>
                <price-unit>1990$/MgHFC245fa</price-unit>
                <output-unit>GgHFC245fa</output-unit>
            </linked-ghg-policy>
            <linked-ghg-policy name="SF6">
                <price-adjust fillout="1" year="1975">0</price-adjust>
                <demand-adjust fillout="1" year="1975">23.9</demand-adjust>
                <market>global</market>
                <linked-policy>GHG</linked-policy>
                <price-unit>1990$/MgSF6</price-unit>
                <output-unit>GgSF6</output-unit>
            </linked-ghg-policy>
            <linked-ghg-policy name="CH4_AWB">
                <price-adjust fillout="1" year="1975">5.727272727</price-adjust>
                <demand-adjust fillout="1" year="1975">21</demand-adjust>
                <market>global</market>
                <linked-policy>GHG</linked-policy>
                <price-unit>1990$/GgCH4</price-unit>
                <output-unit>TgCH4</output-unit>
            </linked-ghg-policy>
            <linked-ghg-policy name="CH4_AGR">
                <price-adjust fillout="1" year="1975">5.727272727</price-adjust>
                <demand-adjust fillout="1" year="1975">21</demand-adjust>
                <market>global</market>
                <linked-policy>GHG</linked-policy>
                <price-unit>1990$/GgCH4</price-unit>
                <output-unit>TgCH4</output-unit>
            </linked-ghg-policy>
            <linked-ghg-policy name="N2O_AWB">
                <price-adjust fillout="1" year="1975">84.54545454</price-adjust>
                <demand-adjust fillout="1" year="1975">310</demand-adjust>
                <market>global</market>
                <linked-policy>GHG</linked-policy>
                <price-unit>1990$/GgN2o</price-unit>
                <output-unit>TgN2O</output-unit>
            </linked-ghg-policy>
            <linked-ghg-policy name="N2O_AGR">
                <price-adjust fillout="1" year="1975">84.54545454</price-adjust>
                <demand-adjust fillout="1" year="1975">310</demand-adjust>
                <market>global</market>
                <linked-policy>GHG</linked-policy>
                <price-unit>1990$/GgN2o</price-unit>
                <output-unit>TgN2O</output-unit>
            </linked-ghg-policy>
            <linked-ghg-policy name="CO2_CDR">
                <price-adjust fillout="1" year="1975">1</price-adjust>
                <demand-adjust fillout="1" year="1975">3.666666667</demand-adjust>
                <market>global</market>
                <linked-policy>GHG</linked-policy>
                <price-unit>1990$/tC</price-unit>
                <output-unit>MtC</output-unit>
            </linked-ghg-policy>
        </region>
        <region name="Africa_Eastern">
            <linked-ghg-policy name="CO2">
                <market>global</market>
                <linked-policy>GHG</linked-policy>
            </linked-ghg-policy>
            <linked-ghg-policy name="CH4">
                <market>global</market>
                <linked-policy>GHG</linked-policy>
            </linked-ghg-policy>
            <linked-ghg-policy name="N2O">
                <market>global</market>
                <linked-policy>GHG</linked-policy>
            </linked-ghg-policy>
            <linked-ghg-policy name="C2F6">
                <market>global</market>
                <linked-policy>GHG</linked-policy>
            </linked-ghg-policy>
            <linked-ghg-policy name="CF4">
                <market>global</market>
                <linked-policy>GHG</linked-policy>
            </linked-ghg-policy>
            <linked-ghg-policy name="HFC125">
                <market>global</market>
                <linked-policy>GHG</linked-policy>
            </linked-ghg-policy>
            <linked-ghg-policy name="HFC134a">
                <market>global</market>
                <linked-policy>GHG</linked-policy>
            </linked-ghg-policy>
            <linked-ghg-policy name="HFC245fa">
                <market>global</market>
                <linked-policy>GHG</linked-policy>
            </linked-ghg-policy>
            <linked-ghg-policy name="SF6">
                <market>global</market>
                <linked-policy>GHG</linked-policy>
            </linked-ghg-policy>
            <linked-ghg-policy name="CH4_AWB">
                <market>global</market>
                <linked-policy>GHG</linked-policy>
            </linked-ghg-policy>
            <linked-ghg-policy name="CH4_AGR">
                <market>global</market>
                <linked-policy>GHG</linked-policy>
            </linked-ghg-policy>
            <linked-ghg-policy name="N2O_AWB">
                <market>global</market>
                <linked-policy>GHG</linked-policy>
            </linked-ghg-policy>
            <linked-ghg-policy name="N2O_AGR">
                <market>global</market>
                <linked-policy>GHG</linked-policy>
            </linked-ghg-policy>
            <linked-ghg-policy name="CO2_CDR">
                <market>global</market>
                <linked-policy>GHG</linked-policy>
            </linked-ghg-policy>
        </region>
        <region name="Africa_Northern">
            <linked-ghg-policy name="CO2">
                <market>global</market>
                <linked-policy>GHG</linked-policy>
            </linked-ghg-policy>
            <linked-ghg-policy name="CH4">
                <market>global</market>
                <linked-policy>GHG</linked-policy>
            </linked-ghg-policy>
            <linked-ghg-policy name="N2O">
                <market>global</market>
                <linked-policy>GHG</linked-policy>
            </linked-ghg-policy>
            <linked-ghg-policy name="C2F6">
                <market>global</market>
                <linked-policy>GHG</linked-policy>
            </linked-ghg-policy>
            <linked-ghg-policy name="CF4">
                <market>global</market>
                <linked-policy>GHG</linked-policy>
            </linked-ghg-policy>
            <linked-ghg-policy name="HFC125">
                <market>global</market>
                <linked-policy>GHG</linked-policy>
            </linked-ghg-policy>
            <linked-ghg-policy name="HFC134a">
                <market>global</market>
                <linked-policy>GHG</linked-policy>
            </linked-ghg-policy>
            <linked-ghg-policy name="HFC245fa">
                <market>global</market>
                <linked-policy>GHG</linked-policy>
            </linked-ghg-policy>
            <linked-ghg-policy name="SF6">
                <market>global</market>
                <linked-policy>GHG</linked-policy>
            </linked-ghg-policy>
            <linked-ghg-policy name="CH4_AWB">
                <market>global</market>
                <linked-policy>GHG</linked-policy>
            </linked-ghg-policy>
            <linked-ghg-policy name="CH4_AGR">
                <market>global</market>
                <linked-policy>GHG</linked-policy>
            </linked-ghg-policy>
            <linked-ghg-policy name="N2O_AWB">
                <market>global</market>
                <linked-policy>GHG</linked-policy>
            </linked-ghg-policy>
            <linked-ghg-policy name="N2O_AGR">
                <market>global</market>
                <linked-policy>GHG</linked-policy>
            </linked-ghg-policy>
            <linked-ghg-policy name="CO2_CDR">
                <market>global</market>
                <linked-policy>GHG</linked-policy>
            </linked-ghg-policy>
        </region>
        <region name="Africa_Southern">
            <linked-ghg-policy name="CO2">
                <market>global</market>
                <linked-policy>GHG</linked-policy>
            </linked-ghg-policy>
            <linked-ghg-policy name="CH4">
                <market>global</market>
                <linked-policy>GHG</linked-policy>
            </linked-ghg-policy>
            <linked-ghg-policy name="N2O">
                <market>global</market>
                <linked-policy>GHG</linked-policy>
            </linked-ghg-policy>
            <linked-ghg-policy name="C2F6">
                <market>global</market>
                <linked-policy>GHG</linked-policy>
            </linked-ghg-policy>
            <linked-ghg-policy name="CF4">
                <market>global</market>
                <linked-policy>GHG</linked-policy>
            </linked-ghg-policy>
            <linked-ghg-policy name="HFC125">
                <market>global</market>
                <linked-policy>GHG</linked-policy>
            </linked-ghg-policy>
            <linked-ghg-policy name="HFC134a">
                <market>global</market>
                <linked-policy>GHG</linked-policy>
            </linked-ghg-policy>
            <linked-ghg-policy name="HFC245fa">
                <market>global</market>
                <linked-policy>GHG</linked-policy>
            </linked-ghg-policy>
            <linked-ghg-policy name="SF6">
                <market>global</market>
                <linked-policy>GHG</linked-policy>
            </linked-ghg-policy>
            <linked-ghg-policy name="CH4_AWB">
                <market>global</market>
                <linked-policy>GHG</linked-policy>
            </linked-ghg-policy>
            <linked-ghg-policy name="CH4_AGR">
                <market>global</market>
                <linked-policy>GHG</linked-policy>
            </linked-ghg-policy>
            <linked-ghg-policy name="N2O_AWB">
                <market>global</market>
                <linked-policy>GHG</linked-policy>
            </linked-ghg-policy>
            <linked-ghg-policy name="N2O_AGR">
                <market>global</market>
                <linked-policy>GHG</linked-policy>
            </linked-ghg-policy>
            <linked-ghg-policy name="CO2_CDR">
                <market>global</market>
                <linked-policy>GHG</linked-policy>
            </linked-ghg-policy>
        </region>
        <region name="Africa_Western">
            <linked-ghg-policy name="CO2">
                <market>global</market>
                <linked-policy>GHG</linked-policy>
            </linked-ghg-policy>
            <linked-ghg-policy name="CH4">
                <market>global</market>
                <linked-policy>GHG</linked-policy>
            </linked-ghg-policy>
            <linked-ghg-policy name="N2O">
                <market>global</market>
                <linked-policy>GHG</linked-policy>
            </linked-ghg-policy>
            <linked-ghg-policy name="C2F6">
                <market>global</market>
                <linked-policy>GHG</linked-policy>
            </linked-ghg-policy>
            <linked-ghg-policy name="CF4">
                <market>global</market>
                <linked-policy>GHG</linked-policy>
            </linked-ghg-policy>
            <linked-ghg-policy name="HFC125">
                <market>global</market>
                <linked-policy>GHG</linked-policy>
            </linked-ghg-policy>
            <linked-ghg-policy name="HFC134a">
                <market>global</market>
                <linked-policy>GHG</linked-policy>
            </linked-ghg-policy>
            <linked-ghg-policy name="HFC245fa">
                <market>global</market>
                <linked-policy>GHG</linked-policy>
            </linked-ghg-policy>
            <linked-ghg-policy name="SF6">
                <market>global</market>
                <linked-policy>GHG</linked-policy>
            </linked-ghg-policy>
            <linked-ghg-policy name="CH4_AWB">
                <market>global</market>
                <linked-policy>GHG</linked-policy>
            </linked-ghg-policy>
            <linked-ghg-policy name="CH4_AGR">
                <market>global</market>
                <linked-policy>GHG</linked-policy>
            </linked-ghg-policy>
            <linked-ghg-policy name="N2O_AWB">
                <market>global</market>
                <linked-policy>GHG</linked-policy>
            </linked-ghg-policy>
            <linked-ghg-policy name="N2O_AGR">
                <market>global</market>
                <linked-policy>GHG</linked-policy>
            </linked-ghg-policy>
            <linked-ghg-policy name="CO2_CDR">
                <market>global</market>
                <linked-policy>GHG</linked-policy>
            </linked-ghg-policy>
        </region>
        <region name="Australia_NZ">
            <linked-ghg-policy name="CO2">
                <market>global</market>
                <linked-policy>GHG</linked-policy>
            </linked-ghg-policy>
            <linked-ghg-policy name="CH4">
                <market>global</market>
                <linked-policy>GHG</linked-policy>
            </linked-ghg-policy>
            <linked-ghg-policy name="N2O">
                <market>global</market>
                <linked-policy>GHG</linked-policy>
            </linked-ghg-policy>
            <linked-ghg-policy name="C2F6">
                <market>global</market>
                <linked-policy>GHG</linked-policy>
            </linked-ghg-policy>
            <linked-ghg-policy name="CF4">
                <market>global</market>
                <linked-policy>GHG</linked-policy>
            </linked-ghg-policy>
            <linked-ghg-policy name="HFC125">
                <market>global</market>
                <linked-policy>GHG</linked-policy>
            </linked-ghg-policy>
            <linked-ghg-policy name="HFC134a">
                <market>global</market>
                <linked-policy>GHG</linked-policy>
            </linked-ghg-policy>
            <linked-ghg-policy name="HFC245fa">
                <market>global</market>
                <linked-policy>GHG</linked-policy>
            </linked-ghg-policy>
            <linked-ghg-policy name="SF6">
                <market>global</market>
                <linked-policy>GHG</linked-policy>
            </linked-ghg-policy>
            <linked-ghg-policy name="CH4_AWB">
                <market>global</market>
                <linked-policy>GHG</linked-policy>
            </linked-ghg-policy>
            <linked-ghg-policy name="CH4_AGR">
                <market>global</market>
                <linked-policy>GHG</linked-policy>
            </linked-ghg-policy>
            <linked-ghg-policy name="N2O_AWB">
                <market>global</market>
                <linked-policy>GHG</linked-policy>
            </linked-ghg-policy>
            <linked-ghg-policy name="N2O_AGR">
                <market>global</market>
                <linked-policy>GHG</linked-policy>
            </linked-ghg-policy>
            <linked-ghg-policy name="CO2_CDR">
                <market>global</market>
                <linked-policy>GHG</linked-policy>
            </linked-ghg-policy>
        </region>
        <region name="Brazil">
            <linked-ghg-policy name="CO2">
                <market>global</market>
                <linked-policy>GHG</linked-policy>
            </linked-ghg-policy>
            <linked-ghg-policy name="CH4">
                <market>global</market>
                <linked-policy>GHG</linked-policy>
            </linked-ghg-policy>
            <linked-ghg-policy name="N2O">
                <market>global</market>
                <linked-policy>GHG</linked-policy>
            </linked-ghg-policy>
            <linked-ghg-policy name="C2F6">
                <market>global</market>
                <linked-policy>GHG</linked-policy>
            </linked-ghg-policy>
            <linked-ghg-policy name="CF4">
                <market>global</market>
                <linked-policy>GHG</linked-policy>
            </linked-ghg-policy>
            <linked-ghg-policy name="HFC125">
                <market>global</market>
                <linked-policy>GHG</linked-policy>
            </linked-ghg-policy>
            <linked-ghg-policy name="HFC134a">
                <market>global</market>
                <linked-policy>GHG</linked-policy>
            </linked-ghg-policy>
            <linked-ghg-policy name="HFC245fa">
                <market>global</market>
                <linked-policy>GHG</linked-policy>
            </linked-ghg-policy>
            <linked-ghg-policy name="SF6">
                <market>global</market>
                <linked-policy>GHG</linked-policy>
            </linked-ghg-policy>
            <linked-ghg-policy name="CH4_AWB">
                <market>global</market>
                <linked-policy>GHG</linked-policy>
            </linked-ghg-policy>
            <linked-ghg-policy name="CH4_AGR">
                <market>global</market>
                <linked-policy>GHG</linked-policy>
            </linked-ghg-policy>
            <linked-ghg-policy name="N2O_AWB">
                <market>global</market>
                <linked-policy>GHG</linked-policy>
            </linked-ghg-policy>
            <linked-ghg-policy name="N2O_AGR">
                <market>global</market>
                <linked-policy>GHG</linked-policy>
            </linked-ghg-policy>
            <linked-ghg-policy name="CO2_CDR">
                <market>global</market>
                <linked-policy>GHG</linked-policy>
            </linked-ghg-policy>
        </region>
        <region name="Canada">
            <linked-ghg-policy name="CO2">
                <market>global</market>
                <linked-policy>GHG</linked-policy>
            </linked-ghg-policy>
            <linked-ghg-policy name="CH4">
                <market>global</market>
                <linked-policy>GHG</linked-policy>
            </linked-ghg-policy>
            <linked-ghg-policy name="N2O">
                <market>global</market>
                <linked-policy>GHG</linked-policy>
            </linked-ghg-policy>
            <linked-ghg-policy name="C2F6">
                <market>global</market>
                <linked-policy>GHG</linked-policy>
            </linked-ghg-policy>
            <linked-ghg-policy name="CF4">
                <market>global</market>
                <linked-policy>GHG</linked-policy>
            </linked-ghg-policy>
            <linked-ghg-policy name="HFC125">
                <market>global</market>
                <linked-policy>GHG</linked-policy>
            </linked-ghg-policy>
            <linked-ghg-policy name="HFC134a">
                <market>global</market>
                <linked-policy>GHG</linked-policy>
            </linked-ghg-policy>
            <linked-ghg-policy name="HFC245fa">
                <market>global</market>
                <linked-policy>GHG</linked-policy>
            </linked-ghg-policy>
            <linked-ghg-policy name="SF6">
                <market>global</market>
                <linked-policy>GHG</linked-policy>
            </linked-ghg-policy>
            <linked-ghg-policy name="CH4_AWB">
                <market>global</market>
                <linked-policy>GHG</linked-policy>
            </linked-ghg-policy>
            <linked-ghg-policy name="CH4_AGR">
                <market>global</market>
                <linked-policy>GHG</linked-policy>
            </linked-ghg-policy>
            <linked-ghg-policy name="N2O_AWB">
                <market>global</market>
                <linked-policy>GHG</linked-policy>
            </linked-ghg-policy>
            <linked-ghg-policy name="N2O_AGR">
                <market>global</market>
                <linked-policy>GHG</linked-policy>
            </linked-ghg-policy>
            <linked-ghg-policy name="CO2_CDR">
                <market>global</market>
                <linked-policy>GHG</linked-policy>
            </linked-ghg-policy>
        </region>
        <region name="Central America and Caribbean">
            <linked-ghg-policy name="CO2">
                <market>global</market>
                <linked-policy>GHG</linked-policy>
            </linked-ghg-policy>
            <linked-ghg-policy name="CH4">
                <market>global</market>
                <linked-policy>GHG</linked-policy>
            </linked-ghg-policy>
            <linked-ghg-policy name="N2O">
                <market>global</market>
                <linked-policy>GHG</linked-policy>
            </linked-ghg-policy>
            <linked-ghg-policy name="C2F6">
                <market>global</market>
                <linked-policy>GHG</linked-policy>
            </linked-ghg-policy>
            <linked-ghg-policy name="CF4">
                <market>global</market>
                <linked-policy>GHG</linked-policy>
            </linked-ghg-policy>
            <linked-ghg-policy name="HFC125">
                <market>global</market>
                <linked-policy>GHG</linked-policy>
            </linked-ghg-policy>
            <linked-ghg-policy name="HFC134a">
                <market>global</market>
                <linked-policy>GHG</linked-policy>
            </linked-ghg-policy>
            <linked-ghg-policy name="HFC245fa">
                <market>global</market>
                <linked-policy>GHG</linked-policy>
            </linked-ghg-policy>
            <linked-ghg-policy name="SF6">
                <market>global</market>
                <linked-policy>GHG</linked-policy>
            </linked-ghg-policy>
            <linked-ghg-policy name="CH4_AWB">
                <market>global</market>
                <linked-policy>GHG</linked-policy>
            </linked-ghg-policy>
            <linked-ghg-policy name="CH4_AGR">
                <market>global</market>
                <linked-policy>GHG</linked-policy>
            </linked-ghg-policy>
            <linked-ghg-policy name="N2O_AWB">
                <market>global</market>
                <linked-policy>GHG</linked-policy>
            </linked-ghg-policy>
            <linked-ghg-policy name="N2O_AGR">
                <market>global</market>
                <linked-policy>GHG</linked-policy>
            </linked-ghg-policy>
            <linked-ghg-policy name="CO2_CDR">
                <market>global</market>
                <linked-policy>GHG</linked-policy>
            </linked-ghg-policy>
        </region>
        <region name="Central Asia">
            <linked-ghg-policy name="CO2">
                <market>global</market>
                <linked-policy>GHG</linked-policy>
            </linked-ghg-policy>
            <linked-ghg-policy name="CH4">
                <market>global</market>
                <linked-policy>GHG</linked-policy>
            </linked-ghg-policy>
            <linked-ghg-policy name="N2O">
                <market>global</market>
                <linked-policy>GHG</linked-policy>
            </linked-ghg-policy>
            <linked-ghg-policy name="C2F6">
                <market>global</market>
                <linked-policy>GHG</linked-policy>
            </linked-ghg-policy>
            <linked-ghg-policy name="CF4">
                <market>global</market>
                <linked-policy>GHG</linked-policy>
            </linked-ghg-policy>
            <linked-ghg-policy name="HFC125">
                <market>global</market>
                <linked-policy>GHG</linked-policy>
            </linked-ghg-policy>
            <linked-ghg-policy name="HFC134a">
                <market>global</market>
                <linked-policy>GHG</linked-policy>
            </linked-ghg-policy>
            <linked-ghg-policy name="HFC245fa">
                <market>global</market>
                <linked-policy>GHG</linked-policy>
            </linked-ghg-policy>
            <linked-ghg-policy name="SF6">
                <market>global</market>
                <linked-policy>GHG</linked-policy>
            </linked-ghg-policy>
            <linked-ghg-policy name="CH4_AWB">
                <market>global</market>
                <linked-policy>GHG</linked-policy>
            </linked-ghg-policy>
            <linked-ghg-policy name="CH4_AGR">
                <market>global</market>
                <linked-policy>GHG</linked-policy>
            </linked-ghg-policy>
            <linked-ghg-policy name="N2O_AWB">
                <market>global</market>
                <linked-policy>GHG</linked-policy>
            </linked-ghg-policy>
            <linked-ghg-policy name="N2O_AGR">
                <market>global</market>
                <linked-policy>GHG</linked-policy>
            </linked-ghg-policy>
            <linked-ghg-policy name="CO2_CDR">
                <market>global</market>
                <linked-policy>GHG</linked-policy>
            </linked-ghg-policy>
        </region>
        <region name="China">
            <linked-ghg-policy name="CO2">
                <market>global</market>
                <linked-policy>GHG</linked-policy>
            </linked-ghg-policy>
            <linked-ghg-policy name="CH4">
                <market>global</market>
                <linked-policy>GHG</linked-policy>
            </linked-ghg-policy>
            <linked-ghg-policy name="N2O">
                <market>global</market>
                <linked-policy>GHG</linked-policy>
            </linked-ghg-policy>
            <linked-ghg-policy name="C2F6">
                <market>global</market>
                <linked-policy>GHG</linked-policy>
            </linked-ghg-policy>
            <linked-ghg-policy name="CF4">
                <market>global</market>
                <linked-policy>GHG</linked-policy>
            </linked-ghg-policy>
            <linked-ghg-policy name="HFC125">
                <market>global</market>
                <linked-policy>GHG</linked-policy>
            </linked-ghg-policy>
            <linked-ghg-policy name="HFC134a">
                <market>global</market>
                <linked-policy>GHG</linked-policy>
            </linked-ghg-policy>
            <linked-ghg-policy name="HFC245fa">
                <market>global</market>
                <linked-policy>GHG</linked-policy>
            </linked-ghg-policy>
            <linked-ghg-policy name="SF6">
                <market>global</market>
                <linked-policy>GHG</linked-policy>
            </linked-ghg-policy>
            <linked-ghg-policy name="CH4_AWB">
                <market>global</market>
                <linked-policy>GHG</linked-policy>
            </linked-ghg-policy>
            <linked-ghg-policy name="CH4_AGR">
                <market>global</market>
                <linked-policy>GHG</linked-policy>
            </linked-ghg-policy>
            <linked-ghg-policy name="N2O_AWB">
                <market>global</market>
                <linked-policy>GHG</linked-policy>
            </linked-ghg-policy>
            <linked-ghg-policy name="N2O_AGR">
                <market>global</market>
                <linked-policy>GHG</linked-policy>
            </linked-ghg-policy>
            <linked-ghg-policy name="CO2_CDR">
                <market>global</market>
                <linked-policy>GHG</linked-policy>
            </linked-ghg-policy>
        </region>
        <region name="EU-12">
            <linked-ghg-policy name="CO2">
                <market>global</market>
                <linked-policy>GHG</linked-policy>
            </linked-ghg-policy>
            <linked-ghg-policy name="CH4">
                <market>global</market>
                <linked-policy>GHG</linked-policy>
            </linked-ghg-policy>
            <linked-ghg-policy name="N2O">
                <market>global</market>
                <linked-policy>GHG</linked-policy>
            </linked-ghg-policy>
            <linked-ghg-policy name="C2F6">
                <market>global</market>
                <linked-policy>GHG</linked-policy>
            </linked-ghg-policy>
            <linked-ghg-policy name="CF4">
                <market>global</market>
                <linked-policy>GHG</linked-policy>
            </linked-ghg-policy>
            <linked-ghg-policy name="HFC125">
                <market>global</market>
                <linked-policy>GHG</linked-policy>
            </linked-ghg-policy>
            <linked-ghg-policy name="HFC134a">
                <market>global</market>
                <linked-policy>GHG</linked-policy>
            </linked-ghg-policy>
            <linked-ghg-policy name="HFC245fa">
                <market>global</market>
                <linked-policy>GHG</linked-policy>
            </linked-ghg-policy>
            <linked-ghg-policy name="SF6">
                <market>global</market>
                <linked-policy>GHG</linked-policy>
            </linked-ghg-policy>
            <linked-ghg-policy name="CH4_AWB">
                <market>global</market>
                <linked-policy>GHG</linked-policy>
            </linked-ghg-policy>
            <linked-ghg-policy name="CH4_AGR">
                <market>global</market>
                <linked-policy>GHG</linked-policy>
            </linked-ghg-policy>
            <linked-ghg-policy name="N2O_AWB">
                <market>global</market>
                <linked-policy>GHG</linked-policy>
            </linked-ghg-policy>
            <linked-ghg-policy name="N2O_AGR">
                <market>global</market>
                <linked-policy>GHG</linked-policy>
            </linked-ghg-policy>
            <linked-ghg-policy name="CO2_CDR">
                <market>global</market>
                <linked-policy>GHG</linked-policy>
            </linked-ghg-policy>
        </region>
        <region name="EU-15">
            <linked-ghg-policy name="CO2">
                <market>global</market>
                <linked-policy>GHG</linked-policy>
            </linked-ghg-policy>
            <linked-ghg-policy name="CH4">
                <market>global</market>
                <linked-policy>GHG</linked-policy>
            </linked-ghg-policy>
            <linked-ghg-policy name="N2O">
                <market>global</market>
                <linked-policy>GHG</linked-policy>
            </linked-ghg-policy>
            <linked-ghg-policy name="C2F6">
                <market>global</market>
                <linked-policy>GHG</linked-policy>
            </linked-ghg-policy>
            <linked-ghg-policy name="CF4">
                <market>global</market>
                <linked-policy>GHG</linked-policy>
            </linked-ghg-policy>
            <linked-ghg-policy name="HFC125">
                <market>global</market>
                <linked-policy>GHG</linked-policy>
            </linked-ghg-policy>
            <linked-ghg-policy name="HFC134a">
                <market>global</market>
                <linked-policy>GHG</linked-policy>
            </linked-ghg-policy>
            <linked-ghg-policy name="HFC245fa">
                <market>global</market>
                <linked-policy>GHG</linked-policy>
            </linked-ghg-policy>
            <linked-ghg-policy name="SF6">
                <market>global</market>
                <linked-policy>GHG</linked-policy>
            </linked-ghg-policy>
            <linked-ghg-policy name="CH4_AWB">
                <market>global</market>
                <linked-policy>GHG</linked-policy>
            </linked-ghg-policy>
            <linked-ghg-policy name="CH4_AGR">
                <market>global</market>
                <linked-policy>GHG</linked-policy>
            </linked-ghg-policy>
            <linked-ghg-policy name="N2O_AWB">
                <market>global</market>
                <linked-policy>GHG</linked-policy>
            </linked-ghg-policy>
            <linked-ghg-policy name="N2O_AGR">
                <market>global</market>
                <linked-policy>GHG</linked-policy>
            </linked-ghg-policy>
            <linked-ghg-policy name="CO2_CDR">
                <market>global</market>
                <linked-policy>GHG</linked-policy>
            </linked-ghg-policy>
        </region>
        <region name="Europe_Eastern">
            <linked-ghg-policy name="CO2">
                <market>global</market>
                <linked-policy>GHG</linked-policy>
            </linked-ghg-policy>
            <linked-ghg-policy name="CH4">
                <market>global</market>
                <linked-policy>GHG</linked-policy>
            </linked-ghg-policy>
            <linked-ghg-policy name="N2O">
                <market>global</market>
                <linked-policy>GHG</linked-policy>
            </linked-ghg-policy>
            <linked-ghg-policy name="C2F6">
                <market>global</market>
                <linked-policy>GHG</linked-policy>
            </linked-ghg-policy>
            <linked-ghg-policy name="CF4">
                <market>global</market>
                <linked-policy>GHG</linked-policy>
            </linked-ghg-policy>
            <linked-ghg-policy name="HFC125">
                <market>global</market>
                <linked-policy>GHG</linked-policy>
            </linked-ghg-policy>
            <linked-ghg-policy name="HFC134a">
                <market>global</market>
                <linked-policy>GHG</linked-policy>
            </linked-ghg-policy>
            <linked-ghg-policy name="HFC245fa">
                <market>global</market>
                <linked-policy>GHG</linked-policy>
            </linked-ghg-policy>
            <linked-ghg-policy name="SF6">
                <market>global</market>
                <linked-policy>GHG</linked-policy>
            </linked-ghg-policy>
            <linked-ghg-policy name="CH4_AWB">
                <market>global</market>
                <linked-policy>GHG</linked-policy>
            </linked-ghg-policy>
            <linked-ghg-policy name="CH4_AGR">
                <market>global</market>
                <linked-policy>GHG</linked-policy>
            </linked-ghg-policy>
            <linked-ghg-policy name="N2O_AWB">
                <market>global</market>
                <linked-policy>GHG</linked-policy>
            </linked-ghg-policy>
            <linked-ghg-policy name="N2O_AGR">
                <market>global</market>
                <linked-policy>GHG</linked-policy>
            </linked-ghg-policy>
            <linked-ghg-policy name="CO2_CDR">
                <market>global</market>
                <linked-policy>GHG</linked-policy>
            </linked-ghg-policy>
        </region>
        <region name="Europe_Non_EU">
            <linked-ghg-policy name="CO2">
                <market>global</market>
                <linked-policy>GHG</linked-policy>
            </linked-ghg-policy>
            <linked-ghg-policy name="CH4">
                <market>global</market>
                <linked-policy>GHG</linked-policy>
            </linked-ghg-policy>
            <linked-ghg-policy name="N2O">
                <market>global</market>
                <linked-policy>GHG</linked-policy>
            </linked-ghg-policy>
            <linked-ghg-policy name="C2F6">
                <market>global</market>
                <linked-policy>GHG</linked-policy>
            </linked-ghg-policy>
            <linked-ghg-policy name="CF4">
                <market>global</market>
                <linked-policy>GHG</linked-policy>
            </linked-ghg-policy>
            <linked-ghg-policy name="HFC125">
                <market>global</market>
                <linked-policy>GHG</linked-policy>
            </linked-ghg-policy>
            <linked-ghg-policy name="HFC134a">
                <market>global</market>
                <linked-policy>GHG</linked-policy>
            </linked-ghg-policy>
            <linked-ghg-policy name="HFC245fa">
                <market>global</market>
                <linked-policy>GHG</linked-policy>
            </linked-ghg-policy>
            <linked-ghg-policy name="SF6">
                <market>global</market>
                <linked-policy>GHG</linked-policy>
            </linked-ghg-policy>
            <linked-ghg-policy name="CH4_AWB">
                <market>global</market>
                <linked-policy>GHG</linked-policy>
            </linked-ghg-policy>
            <linked-ghg-policy name="CH4_AGR">
                <market>global</market>
                <linked-policy>GHG</linked-policy>
            </linked-ghg-policy>
            <linked-ghg-policy name="N2O_AWB">
                <market>global</market>
                <linked-policy>GHG</linked-policy>
            </linked-ghg-policy>
            <linked-ghg-policy name="N2O_AGR">
                <market>global</market>
                <linked-policy>GHG</linked-policy>
            </linked-ghg-policy>
            <linked-ghg-policy name="CO2_CDR">
                <market>global</market>
                <linked-policy>GHG</linked-policy>
            </linked-ghg-policy>
        </region>
        <region name="European Free Trade Association">
            <linked-ghg-policy name="CO2">
                <market>global</market>
                <linked-policy>GHG</linked-policy>
            </linked-ghg-policy>
            <linked-ghg-policy name="CH4">
                <market>global</market>
                <linked-policy>GHG</linked-policy>
            </linked-ghg-policy>
            <linked-ghg-policy name="N2O">
                <market>global</market>
                <linked-policy>GHG</linked-policy>
            </linked-ghg-policy>
            <linked-ghg-policy name="C2F6">
                <market>global</market>
                <linked-policy>GHG</linked-policy>
            </linked-ghg-policy>
            <linked-ghg-policy name="CF4">
                <market>global</market>
                <linked-policy>GHG</linked-policy>
            </linked-ghg-policy>
            <linked-ghg-policy name="HFC125">
                <market>global</market>
                <linked-policy>GHG</linked-policy>
            </linked-ghg-policy>
            <linked-ghg-policy name="HFC134a">
                <market>global</market>
                <linked-policy>GHG</linked-policy>
            </linked-ghg-policy>
            <linked-ghg-policy name="HFC245fa">
                <market>global</market>
                <linked-policy>GHG</linked-policy>
            </linked-ghg-policy>
            <linked-ghg-policy name="SF6">
                <market>global</market>
                <linked-policy>GHG</linked-policy>
            </linked-ghg-policy>
            <linked-ghg-policy name="CH4_AWB">
                <market>global</market>
                <linked-policy>GHG</linked-policy>
            </linked-ghg-policy>
            <linked-ghg-policy name="CH4_AGR">
                <market>global</market>
                <linked-policy>GHG</linked-policy>
            </linked-ghg-policy>
            <linked-ghg-policy name="N2O_AWB">
                <market>global</market>
                <linked-policy>GHG</linked-policy>
            </linked-ghg-policy>
            <linked-ghg-policy name="N2O_AGR">
                <market>global</market>
                <linked-policy>GHG</linked-policy>
            </linked-ghg-policy>
            <linked-ghg-policy name="CO2_CDR">
                <market>global</market>
                <linked-policy>GHG</linked-policy>
            </linked-ghg-policy>
        </region>
        <region name="India">
            <linked-ghg-policy name="CO2">
                <market>global</market>
                <linked-policy>GHG</linked-policy>
            </linked-ghg-policy>
            <linked-ghg-policy name="CH4">
                <market>global</market>
                <linked-policy>GHG</linked-policy>
            </linked-ghg-policy>
            <linked-ghg-policy name="N2O">
                <market>global</market>
                <linked-policy>GHG</linked-policy>
            </linked-ghg-policy>
            <linked-ghg-policy name="C2F6">
                <market>global</market>
                <linked-policy>GHG</linked-policy>
            </linked-ghg-policy>
            <linked-ghg-policy name="CF4">
                <market>global</market>
                <linked-policy>GHG</linked-policy>
            </linked-ghg-policy>
            <linked-ghg-policy name="HFC125">
                <market>global</market>
                <linked-policy>GHG</linked-policy>
            </linked-ghg-policy>
            <linked-ghg-policy name="HFC134a">
                <market>global</market>
                <linked-policy>GHG</linked-policy>
            </linked-ghg-policy>
            <linked-ghg-policy name="HFC245fa">
                <market>global</market>
                <linked-policy>GHG</linked-policy>
            </linked-ghg-policy>
            <linked-ghg-policy name="SF6">
                <market>global</market>
                <linked-policy>GHG</linked-policy>
            </linked-ghg-policy>
            <linked-ghg-policy name="CH4_AWB">
                <market>global</market>
                <linked-policy>GHG</linked-policy>
            </linked-ghg-policy>
            <linked-ghg-policy name="CH4_AGR">
                <market>global</market>
                <linked-policy>GHG</linked-policy>
            </linked-ghg-policy>
            <linked-ghg-policy name="N2O_AWB">
                <market>global</market>
                <linked-policy>GHG</linked-policy>
            </linked-ghg-policy>
            <linked-ghg-policy name="N2O_AGR">
                <market>global</market>
                <linked-policy>GHG</linked-policy>
            </linked-ghg-policy>
            <linked-ghg-policy name="CO2_CDR">
                <market>global</market>
                <linked-policy>GHG</linked-policy>
            </linked-ghg-policy>
        </region>
        <region name="Indonesia">
            <linked-ghg-policy name="CO2">
                <market>global</market>
                <linked-policy>GHG</linked-policy>
            </linked-ghg-policy>
            <linked-ghg-policy name="CH4">
                <market>global</market>
                <linked-policy>GHG</linked-policy>
            </linked-ghg-policy>
            <linked-ghg-policy name="N2O">
                <market>global</market>
                <linked-policy>GHG</linked-policy>
            </linked-ghg-policy>
            <linked-ghg-policy name="C2F6">
                <market>global</market>
                <linked-policy>GHG</linked-policy>
            </linked-ghg-policy>
            <linked-ghg-policy name="CF4">
                <market>global</market>
                <linked-policy>GHG</linked-policy>
            </linked-ghg-policy>
            <linked-ghg-policy name="HFC125">
                <market>global</market>
                <linked-policy>GHG</linked-policy>
            </linked-ghg-policy>
            <linked-ghg-policy name="HFC134a">
                <market>global</market>
                <linked-policy>GHG</linked-policy>
            </linked-ghg-policy>
            <linked-ghg-policy name="HFC245fa">
                <market>global</market>
                <linked-policy>GHG</linked-policy>
            </linked-ghg-policy>
            <linked-ghg-policy name="SF6">
                <market>global</market>
                <linked-policy>GHG</linked-policy>
            </linked-ghg-policy>
            <linked-ghg-policy name="CH4_AWB">
                <market>global</market>
                <linked-policy>GHG</linked-policy>
            </linked-ghg-policy>
            <linked-ghg-policy name="CH4_AGR">
                <market>global</market>
                <linked-policy>GHG</linked-policy>
            </linked-ghg-policy>
            <linked-ghg-policy name="N2O_AWB">
                <market>global</market>
                <linked-policy>GHG</linked-policy>
            </linked-ghg-policy>
            <linked-ghg-policy name="N2O_AGR">
                <market>global</market>
                <linked-policy>GHG</linked-policy>
            </linked-ghg-policy>
            <linked-ghg-policy name="CO2_CDR">
                <market>global</market>
                <linked-policy>GHG</linked-policy>
            </linked-ghg-policy>
        </region>
        <region name="Japan">
            <linked-ghg-policy name="CO2">
                <market>global</market>
                <linked-policy>GHG</linked-policy>
            </linked-ghg-policy>
            <linked-ghg-policy name="CH4">
                <market>global</market>
                <linked-policy>GHG</linked-policy>
            </linked-ghg-policy>
            <linked-ghg-policy name="N2O">
                <market>global</market>
                <linked-policy>GHG</linked-policy>
            </linked-ghg-policy>
            <linked-ghg-policy name="C2F6">
                <market>global</market>
                <linked-policy>GHG</linked-policy>
            </linked-ghg-policy>
            <linked-ghg-policy name="CF4">
                <market>global</market>
                <linked-policy>GHG</linked-policy>
            </linked-ghg-policy>
            <linked-ghg-policy name="HFC125">
                <market>global</market>
                <linked-policy>GHG</linked-policy>
            </linked-ghg-policy>
            <linked-ghg-policy name="HFC134a">
                <market>global</market>
                <linked-policy>GHG</linked-policy>
            </linked-ghg-policy>
            <linked-ghg-policy name="HFC245fa">
                <market>global</market>
                <linked-policy>GHG</linked-policy>
            </linked-ghg-policy>
            <linked-ghg-policy name="SF6">
                <market>global</market>
                <linked-policy>GHG</linked-policy>
            </linked-ghg-policy>
            <linked-ghg-policy name="CH4_AWB">
                <market>global</market>
                <linked-policy>GHG</linked-policy>
            </linked-ghg-policy>
            <linked-ghg-policy name="CH4_AGR">
                <market>global</market>
                <linked-policy>GHG</linked-policy>
            </linked-ghg-policy>
            <linked-ghg-policy name="N2O_AWB">
                <market>global</market>
                <linked-policy>GHG</linked-policy>
            </linked-ghg-policy>
            <linked-ghg-policy name="N2O_AGR">
                <market>global</market>
                <linked-policy>GHG</linked-policy>
            </linked-ghg-policy>
            <linked-ghg-policy name="CO2_CDR">
                <market>global</market>
                <linked-policy>GHG</linked-policy>
            </linked-ghg-policy>
        </region>
        <region name="Mexico">
            <linked-ghg-policy name="CO2">
                <market>global</market>
                <linked-policy>GHG</linked-policy>
            </linked-ghg-policy>
            <linked-ghg-policy name="CH4">
                <market>global</market>
                <linked-policy>GHG</linked-policy>
            </linked-ghg-policy>
            <linked-ghg-policy name="N2O">
                <market>global</market>
                <linked-policy>GHG</linked-policy>
            </linked-ghg-policy>
            <linked-ghg-policy name="C2F6">
                <market>global</market>
                <linked-policy>GHG</linked-policy>
            </linked-ghg-policy>
            <linked-ghg-policy name="CF4">
                <market>global</market>
                <linked-policy>GHG</linked-policy>
            </linked-ghg-policy>
            <linked-ghg-policy name="HFC125">
                <market>global</market>
                <linked-policy>GHG</linked-policy>
            </linked-ghg-policy>
            <linked-ghg-policy name="HFC134a">
                <market>global</market>
                <linked-policy>GHG</linked-policy>
            </linked-ghg-policy>
            <linked-ghg-policy name="HFC245fa">
                <market>global</market>
                <linked-policy>GHG</linked-policy>
            </linked-ghg-policy>
            <linked-ghg-policy name="SF6">
                <market>global</market>
                <linked-policy>GHG</linked-policy>
            </linked-ghg-policy>
            <linked-ghg-policy name="CH4_AWB">
                <market>global</market>
                <linked-policy>GHG</linked-policy>
            </linked-ghg-policy>
            <linked-ghg-policy name="CH4_AGR">
                <market>global</market>
                <linked-policy>GHG</linked-policy>
            </linked-ghg-policy>
            <linked-ghg-policy name="N2O_AWB">
                <market>global</market>
                <linked-policy>GHG</linked-policy>
            </linked-ghg-policy>
            <linked-ghg-policy name="N2O_AGR">
                <market>global</market>
                <linked-policy>GHG</linked-policy>
            </linked-ghg-policy>
            <linked-ghg-policy name="CO2_CDR">
                <market>global</market>
                <linked-policy>GHG</linked-policy>
            </linked-ghg-policy>
        </region>
        <region name="Middle East">
            <linked-ghg-policy name="CO2">
                <market>global</market>
                <linked-policy>GHG</linked-policy>
            </linked-ghg-policy>
            <linked-ghg-policy name="CH4">
                <market>global</market>
                <linked-policy>GHG</linked-policy>
            </linked-ghg-policy>
            <linked-ghg-policy name="N2O">
                <market>global</market>
                <linked-policy>GHG</linked-policy>
            </linked-ghg-policy>
            <linked-ghg-policy name="C2F6">
                <market>global</market>
                <linked-policy>GHG</linked-policy>
            </linked-ghg-policy>
            <linked-ghg-policy name="CF4">
                <market>global</market>
                <linked-policy>GHG</linked-policy>
            </linked-ghg-policy>
            <linked-ghg-policy name="HFC125">
                <market>global</market>
                <linked-policy>GHG</linked-policy>
            </linked-ghg-policy>
            <linked-ghg-policy name="HFC134a">
                <market>global</market>
                <linked-policy>GHG</linked-policy>
            </linked-ghg-policy>
            <linked-ghg-policy name="HFC245fa">
                <market>global</market>
                <linked-policy>GHG</linked-policy>
            </linked-ghg-policy>
            <linked-ghg-policy name="SF6">
                <market>global</market>
                <linked-policy>GHG</linked-policy>
            </linked-ghg-policy>
            <linked-ghg-policy name="CH4_AWB">
                <market>global</market>
                <linked-policy>GHG</linked-policy>
            </linked-ghg-policy>
            <linked-ghg-policy name="CH4_AGR">
                <market>global</market>
                <linked-policy>GHG</linked-policy>
            </linked-ghg-policy>
            <linked-ghg-policy name="N2O_AWB">
                <market>global</market>
                <linked-policy>GHG</linked-policy>
            </linked-ghg-policy>
            <linked-ghg-policy name="N2O_AGR">
                <market>global</market>
                <linked-policy>GHG</linked-policy>
            </linked-ghg-policy>
            <linked-ghg-policy name="CO2_CDR">
                <market>global</market>
                <linked-policy>GHG</linked-policy>
            </linked-ghg-policy>
        </region>
        <region name="Pakistan">
            <linked-ghg-policy name="CO2">
                <market>global</market>
                <linked-policy>GHG</linked-policy>
            </linked-ghg-policy>
            <linked-ghg-policy name="CH4">
                <market>global</market>
                <linked-policy>GHG</linked-policy>
            </linked-ghg-policy>
            <linked-ghg-policy name="N2O">
                <market>global</market>
                <linked-policy>GHG</linked-policy>
            </linked-ghg-policy>
            <linked-ghg-policy name="C2F6">
                <market>global</market>
                <linked-policy>GHG</linked-policy>
            </linked-ghg-policy>
            <linked-ghg-policy name="CF4">
                <market>global</market>
                <linked-policy>GHG</linked-policy>
            </linked-ghg-policy>
            <linked-ghg-policy name="HFC125">
                <market>global</market>
                <linked-policy>GHG</linked-policy>
            </linked-ghg-policy>
            <linked-ghg-policy name="HFC134a">
                <market>global</market>
                <linked-policy>GHG</linked-policy>
            </linked-ghg-policy>
            <linked-ghg-policy name="HFC245fa">
                <market>global</market>
                <linked-policy>GHG</linked-policy>
            </linked-ghg-policy>
            <linked-ghg-policy name="SF6">
                <market>global</market>
                <linked-policy>GHG</linked-policy>
            </linked-ghg-policy>
            <linked-ghg-policy name="CH4_AWB">
                <market>global</market>
                <linked-policy>GHG</linked-policy>
            </linked-ghg-policy>
            <linked-ghg-policy name="CH4_AGR">
                <market>global</market>
                <linked-policy>GHG</linked-policy>
            </linked-ghg-policy>
            <linked-ghg-policy name="N2O_AWB">
                <market>global</market>
                <linked-policy>GHG</linked-policy>
            </linked-ghg-policy>
            <linked-ghg-policy name="N2O_AGR">
                <market>global</market>
                <linked-policy>GHG</linked-policy>
            </linked-ghg-policy>
            <linked-ghg-policy name="CO2_CDR">
                <market>global</market>
                <linked-policy>GHG</linked-policy>
            </linked-ghg-policy>
        </region>
        <region name="Russia">
            <linked-ghg-policy name="CO2">
                <market>global</market>
                <linked-policy>GHG</linked-policy>
            </linked-ghg-policy>
            <linked-ghg-policy name="CH4">
                <market>global</market>
                <linked-policy>GHG</linked-policy>
            </linked-ghg-policy>
            <linked-ghg-policy name="N2O">
                <market>global</market>
                <linked-policy>GHG</linked-policy>
            </linked-ghg-policy>
            <linked-ghg-policy name="C2F6">
                <market>global</market>
                <linked-policy>GHG</linked-policy>
            </linked-ghg-policy>
            <linked-ghg-policy name="CF4">
                <market>global</market>
                <linked-policy>GHG</linked-policy>
            </linked-ghg-policy>
            <linked-ghg-policy name="HFC125">
                <market>global</market>
                <linked-policy>GHG</linked-policy>
            </linked-ghg-policy>
            <linked-ghg-policy name="HFC134a">
                <market>global</market>
                <linked-policy>GHG</linked-policy>
            </linked-ghg-policy>
            <linked-ghg-policy name="HFC245fa">
                <market>global</market>
                <linked-policy>GHG</linked-policy>
            </linked-ghg-policy>
            <linked-ghg-policy name="SF6">
                <market>global</market>
                <linked-policy>GHG</linked-policy>
            </linked-ghg-policy>
            <linked-ghg-policy name="CH4_AWB">
                <market>global</market>
                <linked-policy>GHG</linked-policy>
            </linked-ghg-policy>
            <linked-ghg-policy name="CH4_AGR">
                <market>global</market>
                <linked-policy>GHG</linked-policy>
            </linked-ghg-policy>
            <linked-ghg-policy name="N2O_AWB">
                <market>global</market>
                <linked-policy>GHG</linked-policy>
            </linked-ghg-policy>
            <linked-ghg-policy name="N2O_AGR">
                <market>global</market>
                <linked-policy>GHG</linked-policy>
            </linked-ghg-policy>
            <linked-ghg-policy name="CO2_CDR">
                <market>global</market>
                <linked-policy>GHG</linked-policy>
            </linked-ghg-policy>
        </region>
        <region name="South Africa">
            <linked-ghg-policy name="CO2">
                <market>global</market>
                <linked-policy>GHG</linked-policy>
            </linked-ghg-policy>
            <linked-ghg-policy name="CH4">
                <market>global</market>
                <linked-policy>GHG</linked-policy>
            </linked-ghg-policy>
            <linked-ghg-policy name="N2O">
                <market>global</market>
                <linked-policy>GHG</linked-policy>
            </linked-ghg-policy>
            <linked-ghg-policy name="C2F6">
                <market>global</market>
                <linked-policy>GHG</linked-policy>
            </linked-ghg-policy>
            <linked-ghg-policy name="CF4">
                <market>global</market>
                <linked-policy>GHG</linked-policy>
            </linked-ghg-policy>
            <linked-ghg-policy name="HFC125">
                <market>global</market>
                <linked-policy>GHG</linked-policy>
            </linked-ghg-policy>
            <linked-ghg-policy name="HFC134a">
                <market>global</market>
                <linked-policy>GHG</linked-policy>
            </linked-ghg-policy>
            <linked-ghg-policy name="HFC245fa">
                <market>global</market>
                <linked-policy>GHG</linked-policy>
            </linked-ghg-policy>
            <linked-ghg-policy name="SF6">
                <market>global</market>
                <linked-policy>GHG</linked-policy>
            </linked-ghg-policy>
            <linked-ghg-policy name="CH4_AWB">
                <market>global</market>
                <linked-policy>GHG</linked-policy>
            </linked-ghg-policy>
            <linked-ghg-policy name="CH4_AGR">
                <market>global</market>
                <linked-policy>GHG</linked-policy>
            </linked-ghg-policy>
            <linked-ghg-policy name="N2O_AWB">
                <market>global</market>
                <linked-policy>GHG</linked-policy>
            </linked-ghg-policy>
            <linked-ghg-policy name="N2O_AGR">
                <market>global</market>
                <linked-policy>GHG</linked-policy>
            </linked-ghg-policy>
            <linked-ghg-policy name="CO2_CDR">
                <market>global</market>
                <linked-policy>GHG</linked-policy>
            </linked-ghg-policy>
        </region>
        <region name="South America_Northern">
            <linked-ghg-policy name="CO2">
                <market>global</market>
                <linked-policy>GHG</linked-policy>
            </linked-ghg-policy>
            <linked-ghg-policy name="CH4">
                <market>global</market>
                <linked-policy>GHG</linked-policy>
            </linked-ghg-policy>
            <linked-ghg-policy name="N2O">
                <market>global</market>
                <linked-policy>GHG</linked-policy>
            </linked-ghg-policy>
            <linked-ghg-policy name="C2F6">
                <market>global</market>
                <linked-policy>GHG</linked-policy>
            </linked-ghg-policy>
            <linked-ghg-policy name="CF4">
                <market>global</market>
                <linked-policy>GHG</linked-policy>
            </linked-ghg-policy>
            <linked-ghg-policy name="HFC125">
                <market>global</market>
                <linked-policy>GHG</linked-policy>
            </linked-ghg-policy>
            <linked-ghg-policy name="HFC134a">
                <market>global</market>
                <linked-policy>GHG</linked-policy>
            </linked-ghg-policy>
            <linked-ghg-policy name="HFC245fa">
                <market>global</market>
                <linked-policy>GHG</linked-policy>
            </linked-ghg-policy>
            <linked-ghg-policy name="SF6">
                <market>global</market>
                <linked-policy>GHG</linked-policy>
            </linked-ghg-policy>
            <linked-ghg-policy name="CH4_AWB">
                <market>global</market>
                <linked-policy>GHG</linked-policy>
            </linked-ghg-policy>
            <linked-ghg-policy name="CH4_AGR">
                <market>global</market>
                <linked-policy>GHG</linked-policy>
            </linked-ghg-policy>
            <linked-ghg-policy name="N2O_AWB">
                <market>global</market>
                <linked-policy>GHG</linked-policy>
            </linked-ghg-policy>
            <linked-ghg-policy name="N2O_AGR">
                <market>global</market>
                <linked-policy>GHG</linked-policy>
            </linked-ghg-policy>
            <linked-ghg-policy name="CO2_CDR">
                <market>global</market>
                <linked-policy>GHG</linked-policy>
            </linked-ghg-policy>
        </region>
        <region name="South America_Southern">
            <linked-ghg-policy name="CO2">
                <market>global</market>
                <linked-policy>GHG</linked-policy>
            </linked-ghg-policy>
            <linked-ghg-policy name="CH4">
                <market>global</market>
                <linked-policy>GHG</linked-policy>
            </linked-ghg-policy>
            <linked-ghg-policy name="N2O">
                <market>global</market>
                <linked-policy>GHG</linked-policy>
            </linked-ghg-policy>
            <linked-ghg-policy name="C2F6">
                <market>global</market>
                <linked-policy>GHG</linked-policy>
            </linked-ghg-policy>
            <linked-ghg-policy name="CF4">
                <market>global</market>
                <linked-policy>GHG</linked-policy>
            </linked-ghg-policy>
            <linked-ghg-policy name="HFC125">
                <market>global</market>
                <linked-policy>GHG</linked-policy>
            </linked-ghg-policy>
            <linked-ghg-policy name="HFC134a">
                <market>global</market>
                <linked-policy>GHG</linked-policy>
            </linked-ghg-policy>
            <linked-ghg-policy name="HFC245fa">
                <market>global</market>
                <linked-policy>GHG</linked-policy>
            </linked-ghg-policy>
            <linked-ghg-policy name="SF6">
                <market>global</market>
                <linked-policy>GHG</linked-policy>
            </linked-ghg-policy>
            <linked-ghg-policy name="CH4_AWB">
                <market>global</market>
                <linked-policy>GHG</linked-policy>
            </linked-ghg-policy>
            <linked-ghg-policy name="CH4_AGR">
                <market>global</market>
                <linked-policy>GHG</linked-policy>
            </linked-ghg-policy>
            <linked-ghg-policy name="N2O_AWB">
                <market>global</market>
                <linked-policy>GHG</linked-policy>
            </linked-ghg-policy>
            <linked-ghg-policy name="N2O_AGR">
                <market>global</market>
                <linked-policy>GHG</linked-policy>
            </linked-ghg-policy>
            <linked-ghg-policy name="CO2_CDR">
                <market>global</market>
                <linked-policy>GHG</linked-policy>
            </linked-ghg-policy>
        </region>
        <region name="South Asia">
            <linked-ghg-policy name="CO2">
                <market>global</market>
                <linked-policy>GHG</linked-policy>
            </linked-ghg-policy>
            <linked-ghg-policy name="CH4">
                <market>global</market>
                <linked-policy>GHG</linked-policy>
            </linked-ghg-policy>
            <linked-ghg-policy name="N2O">
                <market>global</market>
                <linked-policy>GHG</linked-policy>
            </linked-ghg-policy>
            <linked-ghg-policy name="C2F6">
                <market>global</market>
                <linked-policy>GHG</linked-policy>
            </linked-ghg-policy>
            <linked-ghg-policy name="CF4">
                <market>global</market>
                <linked-policy>GHG</linked-policy>
            </linked-ghg-policy>
            <linked-ghg-policy name="HFC125">
                <market>global</market>
                <linked-policy>GHG</linked-policy>
            </linked-ghg-policy>
            <linked-ghg-policy name="HFC134a">
                <market>global</market>
                <linked-policy>GHG</linked-policy>
            </linked-ghg-policy>
            <linked-ghg-policy name="HFC245fa">
                <market>global</market>
                <linked-policy>GHG</linked-policy>
            </linked-ghg-policy>
            <linked-ghg-policy name="SF6">
                <market>global</market>
                <linked-policy>GHG</linked-policy>
            </linked-ghg-policy>
            <linked-ghg-policy name="CH4_AWB">
                <market>global</market>
                <linked-policy>GHG</linked-policy>
            </linked-ghg-policy>
            <linked-ghg-policy name="CH4_AGR">
                <market>global</market>
                <linked-policy>GHG</linked-policy>
            </linked-ghg-policy>
            <linked-ghg-policy name="N2O_AWB">
                <market>global</market>
                <linked-policy>GHG</linked-policy>
            </linked-ghg-policy>
            <linked-ghg-policy name="N2O_AGR">
                <market>global</market>
                <linked-policy>GHG</linked-policy>
            </linked-ghg-policy>
            <linked-ghg-policy name="CO2_CDR">
                <market>global</market>
                <linked-policy>GHG</linked-policy>
            </linked-ghg-policy>
        </region>
        <region name="South Korea">
            <linked-ghg-policy name="CO2">
                <market>global</market>
                <linked-policy>GHG</linked-policy>
            </linked-ghg-policy>
            <linked-ghg-policy name="CH4">
                <market>global</market>
                <linked-policy>GHG</linked-policy>
            </linked-ghg-policy>
            <linked-ghg-policy name="N2O">
                <market>global</market>
                <linked-policy>GHG</linked-policy>
            </linked-ghg-policy>
            <linked-ghg-policy name="C2F6">
                <market>global</market>
                <linked-policy>GHG</linked-policy>
            </linked-ghg-policy>
            <linked-ghg-policy name="CF4">
                <market>global</market>
                <linked-policy>GHG</linked-policy>
            </linked-ghg-policy>
            <linked-ghg-policy name="HFC125">
                <market>global</market>
                <linked-policy>GHG</linked-policy>
            </linked-ghg-policy>
            <linked-ghg-policy name="HFC134a">
                <market>global</market>
                <linked-policy>GHG</linked-policy>
            </linked-ghg-policy>
            <linked-ghg-policy name="HFC245fa">
                <market>global</market>
                <linked-policy>GHG</linked-policy>
            </linked-ghg-policy>
            <linked-ghg-policy name="SF6">
                <market>global</market>
                <linked-policy>GHG</linked-policy>
            </linked-ghg-policy>
            <linked-ghg-policy name="CH4_AWB">
                <market>global</market>
                <linked-policy>GHG</linked-policy>
            </linked-ghg-policy>
            <linked-ghg-policy name="CH4_AGR">
                <market>global</market>
                <linked-policy>GHG</linked-policy>
            </linked-ghg-policy>
            <linked-ghg-policy name="N2O_AWB">
                <market>global</market>
                <linked-policy>GHG</linked-policy>
            </linked-ghg-policy>
            <linked-ghg-policy name="N2O_AGR">
                <market>global</market>
                <linked-policy>GHG</linked-policy>
            </linked-ghg-policy>
            <linked-ghg-policy name="CO2_CDR">
                <market>global</market>
                <linked-policy>GHG</linked-policy>
            </linked-ghg-policy>
        </region>
        <region name="Southeast Asia">
            <linked-ghg-policy name="CO2">
                <market>global</market>
                <linked-policy>GHG</linked-policy>
            </linked-ghg-policy>
            <linked-ghg-policy name="CH4">
                <market>global</market>
                <linked-policy>GHG</linked-policy>
            </linked-ghg-policy>
            <linked-ghg-policy name="N2O">
                <market>global</market>
                <linked-policy>GHG</linked-policy>
            </linked-ghg-policy>
            <linked-ghg-policy name="C2F6">
                <market>global</market>
                <linked-policy>GHG</linked-policy>
            </linked-ghg-policy>
            <linked-ghg-policy name="CF4">
                <market>global</market>
                <linked-policy>GHG</linked-policy>
            </linked-ghg-policy>
            <linked-ghg-policy name="HFC125">
                <market>global</market>
                <linked-policy>GHG</linked-policy>
            </linked-ghg-policy>
            <linked-ghg-policy name="HFC134a">
                <market>global</market>
                <linked-policy>GHG</linked-policy>
            </linked-ghg-policy>
            <linked-ghg-policy name="HFC245fa">
                <market>global</market>
                <linked-policy>GHG</linked-policy>
            </linked-ghg-policy>
            <linked-ghg-policy name="SF6">
                <market>global</market>
                <linked-policy>GHG</linked-policy>
            </linked-ghg-policy>
            <linked-ghg-policy name="CH4_AWB">
                <market>global</market>
                <linked-policy>GHG</linked-policy>
            </linked-ghg-policy>
            <linked-ghg-policy name="CH4_AGR">
                <market>global</market>
                <linked-policy>GHG</linked-policy>
            </linked-ghg-policy>
            <linked-ghg-policy name="N2O_AWB">
                <market>global</market>
                <linked-policy>GHG</linked-policy>
            </linked-ghg-policy>
            <linked-ghg-policy name="N2O_AGR">
                <market>global</market>
                <linked-policy>GHG</linked-policy>
            </linked-ghg-policy>
            <linked-ghg-policy name="CO2_CDR">
                <market>global</market>
                <linked-policy>GHG</linked-policy>
            </linked-ghg-policy>
        </region>
        <region name="Taiwan">
            <linked-ghg-policy name="CO2">
                <market>global</market>
                <linked-policy>GHG</linked-policy>
            </linked-ghg-policy>
            <linked-ghg-policy name="CH4">
                <market>global</market>
                <linked-policy>GHG</linked-policy>
            </linked-ghg-policy>
            <linked-ghg-policy name="N2O">
                <market>global</market>
                <linked-policy>GHG</linked-policy>
            </linked-ghg-policy>
            <linked-ghg-policy name="C2F6">
                <market>global</market>
                <linked-policy>GHG</linked-policy>
            </linked-ghg-policy>
            <linked-ghg-policy name="CF4">
                <market>global</market>
                <linked-policy>GHG</linked-policy>
            </linked-ghg-policy>
            <linked-ghg-policy name="HFC125">
                <market>global</market>
                <linked-policy>GHG</linked-policy>
            </linked-ghg-policy>
            <linked-ghg-policy name="HFC134a">
                <market>global</market>
                <linked-policy>GHG</linked-policy>
            </linked-ghg-policy>
            <linked-ghg-policy name="HFC245fa">
                <market>global</market>
                <linked-policy>GHG</linked-policy>
            </linked-ghg-policy>
            <linked-ghg-policy name="SF6">
                <market>global</market>
                <linked-policy>GHG</linked-policy>
            </linked-ghg-policy>
            <linked-ghg-policy name="CH4_AWB">
                <market>global</market>
                <linked-policy>GHG</linked-policy>
            </linked-ghg-policy>
            <linked-ghg-policy name="CH4_AGR">
                <market>global</market>
                <linked-policy>GHG</linked-policy>
            </linked-ghg-policy>
            <linked-ghg-policy name="N2O_AWB">
                <market>global</market>
                <linked-policy>GHG</linked-policy>
            </linked-ghg-policy>
            <linked-ghg-policy name="N2O_AGR">
                <market>global</market>
                <linked-policy>GHG</linked-policy>
            </linked-ghg-policy>
            <linked-ghg-policy name="CO2_CDR">
                <market>global</market>
                <linked-policy>GHG</linked-policy>
            </linked-ghg-policy>
        </region>
        <region name="Argentina">
            <linked-ghg-policy name="CO2">
                <market>global</market>
                <linked-policy>GHG</linked-policy>
            </linked-ghg-policy>
            <linked-ghg-policy name="CH4">
                <market>global</market>
                <linked-policy>GHG</linked-policy>
            </linked-ghg-policy>
            <linked-ghg-policy name="N2O">
                <market>global</market>
                <linked-policy>GHG</linked-policy>
            </linked-ghg-policy>
            <linked-ghg-policy name="C2F6">
                <market>global</market>
                <linked-policy>GHG</linked-policy>
            </linked-ghg-policy>
            <linked-ghg-policy name="CF4">
                <market>global</market>
                <linked-policy>GHG</linked-policy>
            </linked-ghg-policy>
            <linked-ghg-policy name="HFC125">
                <market>global</market>
                <linked-policy>GHG</linked-policy>
            </linked-ghg-policy>
            <linked-ghg-policy name="HFC134a">
                <market>global</market>
                <linked-policy>GHG</linked-policy>
            </linked-ghg-policy>
            <linked-ghg-policy name="HFC245fa">
                <market>global</market>
                <linked-policy>GHG</linked-policy>
            </linked-ghg-policy>
            <linked-ghg-policy name="SF6">
                <market>global</market>
                <linked-policy>GHG</linked-policy>
            </linked-ghg-policy>
            <linked-ghg-policy name="CH4_AWB">
                <market>global</market>
                <linked-policy>GHG</linked-policy>
            </linked-ghg-policy>
            <linked-ghg-policy name="CH4_AGR">
                <market>global</market>
                <linked-policy>GHG</linked-policy>
            </linked-ghg-policy>
            <linked-ghg-policy name="N2O_AWB">
                <market>global</market>
                <linked-policy>GHG</linked-policy>
            </linked-ghg-policy>
            <linked-ghg-policy name="N2O_AGR">
                <market>global</market>
                <linked-policy>GHG</linked-policy>
            </linked-ghg-policy>
            <linked-ghg-policy name="CO2_CDR">
                <market>global</market>
                <linked-policy>GHG</linked-policy>
            </linked-ghg-policy>
        </region>
        <region name="Colombia">
            <linked-ghg-policy name="CO2">
                <market>global</market>
                <linked-policy>GHG</linked-policy>
            </linked-ghg-policy>
            <linked-ghg-policy name="CH4">
                <market>global</market>
                <linked-policy>GHG</linked-policy>
            </linked-ghg-policy>
            <linked-ghg-policy name="N2O">
                <market>global</market>
                <linked-policy>GHG</linked-policy>
            </linked-ghg-policy>
            <linked-ghg-policy name="C2F6">
                <market>global</market>
                <linked-policy>GHG</linked-policy>
            </linked-ghg-policy>
            <linked-ghg-policy name="CF4">
                <market>global</market>
                <linked-policy>GHG</linked-policy>
            </linked-ghg-policy>
            <linked-ghg-policy name="HFC125">
                <market>global</market>
                <linked-policy>GHG</linked-policy>
            </linked-ghg-policy>
            <linked-ghg-policy name="HFC134a">
                <market>global</market>
                <linked-policy>GHG</linked-policy>
            </linked-ghg-policy>
            <linked-ghg-policy name="HFC245fa">
                <market>global</market>
                <linked-policy>GHG</linked-policy>
            </linked-ghg-policy>
            <linked-ghg-policy name="SF6">
                <market>global</market>
                <linked-policy>GHG</linked-policy>
            </linked-ghg-policy>
            <linked-ghg-policy name="CH4_AWB">
                <market>global</market>
                <linked-policy>GHG</linked-policy>
            </linked-ghg-policy>
            <linked-ghg-policy name="CH4_AGR">
                <market>global</market>
                <linked-policy>GHG</linked-policy>
            </linked-ghg-policy>
            <linked-ghg-policy name="N2O_AWB">
                <market>global</market>
                <linked-policy>GHG</linked-policy>
            </linked-ghg-policy>
            <linked-ghg-policy name="N2O_AGR">
                <market>global</market>
                <linked-policy>GHG</linked-policy>
            </linked-ghg-policy>
            <linked-ghg-policy name="CO2_CDR">
                <market>global</market>
                <linked-policy>GHG</linked-policy>
            </linked-ghg-policy>
        </region>
    </world>
</scenario>
