# Supplementary material for: GCAM-CDR v1.0: Enhancing the Representation of Carbon Dioxide Removal Technologies and Policies in an Integrated Assessment Model
Source: Copernicus journal article supplement (doi:10.5194/gmd-2022-125), 2022-05-24
Supplement: Supplementary file 1 [file gmd-2022-125-supplement.zip › scenario files/input/policy/S2_LOS.xml]

<?xml version="1.0" encoding="UTF-8"?>
<scenario>
   <world>
      <region name="USA">
         <ghgpolicy name="GHG">
            <market>global</market>
<constraint year="2025">53470.77</constraint>
<constraint year="2030">25999.1</constraint>
<constraint year="2035">17368</constraint>
<constraint year="2040">10635.232</constraint>
<constraint year="2045">4000</constraint>
<constraint year="2050">1291</constraint>
<constraint year="2055">-241.391</constraint>
<constraint year="2060">-1312.532309</constraint>
<constraint year="2065">-2061.260083991</constraint>
<constraint year="2070">-2584.62079870971</constraint>
<constraint year="2075">-2950.44993829809</constraint>
<constraint year="2080">-3206.16450687036</constraint>
<constraint year="2085">-3384.90899030238</constraint>
<constraint year="2090">-3509.85138422137</constraint>
<constraint year="2095">-3597.18611757073</constraint>
<constraint year="2100">-3658.23309618194</constraint>

         </ghgpolicy>
      </region>
      <region name="Canada">
         <ghgpolicy name="GHG">
            <market>global</market>
         </ghgpolicy>
      </region>
      <region name="EU-15">
         <ghgpolicy name="GHG">
            <market>global</market>
         </ghgpolicy>
      </region>
      <region name="Europe_Non_EU">
         <ghgpolicy name="GHG">
            <market>global</market>
         </ghgpolicy>
      </region>
      <region name="European Free Trade Association">
         <ghgpolicy name="GHG">
            <market>global</market>
         </ghgpolicy>
      </region>
      <region name="Japan">
         <ghgpolicy name="GHG">
            <market>global</market>
         </ghgpolicy>
      </region>
      <region name="Australia_NZ">
         <ghgpolicy name="GHG">
            <market>global</market>
         </ghgpolicy>
      </region>
      <region name="Central Asia">
         <ghgpolicy name="GHG">
            <market>global</market>
         </ghgpolicy>
      </region>
      <region name="Russia">
         <ghgpolicy name="GHG">
            <market>global</market>
         </ghgpolicy>
      </region>
      <region name="China">
         <ghgpolicy name="GHG">
            <market>global</market>
         </ghgpolicy>
      </region>
      <region name="Middle East">
         <ghgpolicy name="GHG">
            <market>global</market>
         </ghgpolicy>
      </region>
      <region name="Africa_Eastern">
         <ghgpolicy name="GHG">
            <market>global</market>
         </ghgpolicy>
      </region>
      <region name="Africa_Northern">
         <ghgpolicy name="GHG">
            <market>global</market>
         </ghgpolicy>
      </region>
      <region name="Africa_Southern">
         <ghgpolicy name="GHG">
            <market>global</market>
         </ghgpolicy>
      </region>
      <region name="Africa_Western">
         <ghgpolicy name="GHG">
            <market>global</market>
         </ghgpolicy>
      </region>
      <region name="South Africa">
         <ghgpolicy name="GHG">
            <market>global</market>
         </ghgpolicy>
      </region>
      <region name="Brazil">
         <ghgpolicy name="GHG">
            <market>global</market>
         </ghgpolicy>
      </region>
      <region name="Central America and Caribbean">
         <ghgpolicy name="GHG">
            <market>global</market>
         </ghgpolicy>
      </region>
      <region name="Mexico">
         <ghgpolicy name="GHG">
            <market>global</market>
         </ghgpolicy>
      </region>
      <region name="South America_Northern">
         <ghgpolicy name="GHG">
            <market>global</market>
         </ghgpolicy>
      </region>
      <region name="South America_Southern">
         <ghgpolicy name="GHG">
            <market>global</market>
         </ghgpolicy>
      </region>
      <region name="Argentina">
         <ghgpolicy name="GHG">
            <market>global</market>
         </ghgpolicy>
      </region>
      <region name="Colombia">
         <ghgpolicy name="GHG">
            <market>global</market>
         </ghgpolicy>
      </region>
      <region name="Indonesia">
         <ghgpolicy name="GHG">
            <market>global</market>
         </ghgpolicy>
      </region>
      <region name="Pakistan">
         <ghgpolicy name="GHG">
            <market>global</market>
         </ghgpolicy>
      </region>
      <region name="South Asia">
         <ghgpolicy name="GHG">
            <market>global</market>
         </ghgpolicy>
      </region>
      <region name="Southeast Asia">
         <ghgpolicy name="GHG">
            <market>global</market>
         </ghgpolicy>
      </region>
      <region name="Taiwan">
         <ghgpolicy name="GHG">
            <market>global</market>
         </ghgpolicy>
      </region>
      <region name="Europe_Eastern">
         <ghgpolicy name="GHG">
            <market>global</market>
         </ghgpolicy>
      </region>
      <region name="EU-12">
         <ghgpolicy name="GHG">
            <market>global</market>
         </ghgpolicy>
      </region>
      <region name="South Korea">
         <ghgpolicy name="GHG">
            <market>global</market>
         </ghgpolicy>
      </region>
      <region name="India">
         <ghgpolicy name="GHG">
            <market>global</market>
         </ghgpolicy>
      </region>
   </world>
</scenario>
