# Supplementary material for: GCAM-CDR v1.0: Enhancing the Representation of Carbon Dioxide Removal Technologies and Policies in an Integrated Assessment Model
Source: Copernicus journal article supplement (doi:10.5194/gmd-2022-125), 2022-05-24
Supplement: Supplementary file 1 [file gmd-2022-125-supplement.zip › scenario files/README.txt]

This folder contains batch files and input files needed
to run the scenarios reported in "GCAM-CDR 1.0: Enhancing
the Representation of Carbon Dioxide Removal Technologies
and Policies in an Integrated Assessment Model."

You will need to download GCAM-CDR 1.0 to use these files.
Please go to https://github.com/icrlp/gcam-cdr to download
the model.

The input files in this folder should be moved to the corresponding
folders in your GCAM installation (i.e., /input/policy and 
/input/gcamdata/xml). The batch files should be placed in /exe
and run with the scenario components from the configuration_ref.xml
file.
